## Big Data Reproducibility: Applications in Brain Imaging and Genomics

Eric W. Bridgeford<sup>1</sup>, Shangsi Wang<sup>1</sup>, Zhi Yang<sup>2</sup>, Zeyi Wang<sup>1</sup>, Ting Xu<sup>3</sup>, Cameron Craddock<sup>3</sup>, Jayanta Dey<sup>1</sup>, Gregory Kiar<sup>1</sup>, William Gray-Roncal<sup>1</sup>, Carlo Coulantoni<sup>1</sup>, Christopher Douville<sup>1</sup>, Carey E. Priebe<sup>1</sup>, Brian Caffo<sup>1</sup>, Michael Milham<sup>3</sup>, Xi-Nian Zuo<sup>2,4</sup>, Consortium for Reliability and Reproducibility, Joshua T. Vogelstein<sup>\*1</sup>

**Abstract.** Reproducibility, the ability to replicate analytical findings, is a prerequisite for both scientific discovery and clinical utility. Troublingly, we are in the midst of a reproducibility crisis, in which many investigations fail to replicate. Although many believe that these failings are due to misunderstanding or misapplication of statistical inference (e.g., p-values or the dichotomization of “statistically significant”), we believe the shortcomings arise much earlier in the data science workflow, at the level of measurement, including data acquisition and reconstruction. A key to reproducibility is that multiple measurements of the same item (e.g., experimental sample or clinical participant) are similar to one another, while they are dissimilar from other items. The intra-class correlation coefficient (ICC) quantifies reproducibility in this way, but only for univariate (one dimensional) data, while relying on Gaussian assumptions for validity. In contrast, big data is multivariate (high-dimensional), non-Gaussian, and often non-Euclidean (including text, images, speech, and networks), rendering ICC inadequate. We propose a novel statistic, *discriminability*, which quantifies the degree to which individual samples are similar to one another, without restricting the data to be univariate, Gaussian, or even Euclidean. We then introduce the possibility of optimizing experimental design via increasing discriminability. We prove that optimizing discriminability yields an improved ability to use the data for subsequent inference tasks, without specifying the inference task *a priori*. We then apply this approach three different datasets: a brain imaging dataset built by the “Consortium for Reliability and reproducibility” which consists of 28 disparate magnetic resonance imaging datasets, and two genomics datasets. Discriminability is the only statistic that, by optimizing according to it, improves performance on all subsequent inference tasks for each dataset, despite that they were not considered in the optimization. We therefore suggest that designing experiments and analyses to optimize discriminability may be a crucial step in solving the reproducibility crisis.

**1 Introduction** Reproducibility and reliability are central tenets in data science, whether applied to scientific discovery or clinical utility. As a rule, if results do not reproduce, we do not trust them. In statistics, reproducibility is closely related to *robustness*, which quantifies the robustness of an estimator the model misspecifications (such as additional sources of variance not accounted for in the model) [1]. Reproducibility is also related to *discriminability*, which generalizes robustness in certain ways, for example, whether an estimate is discriminable over multiple random samples of the data [2]. Engineering and operations research have been concerned with *reliability* for a long time, as they require that their products are reliable under various conditions. Very recently, the general research community became interested in these issues, as individuals began noticing and publishing failures to reproduce across fields, including neuroscience and psychology [3–5].

A number of strategies have been suggested to resolve this “reproducibility crisis.” For example, the editors of “Basic and Applied Social Psychology” have banned the use of p-values [6]. Unfortunately, an analysis of the publications since banning indicates that studies after the ban tended to overstate, rather than understate, their claims, suggesting that this proposal possibly had the opposite effect [7]. More recently, the American Statistical Association released a statement recommending banning the phrase “statistically significant” for similar reasons [8].

A different strategy has been to quantify the reproducibility or reliability of ones’ data after collection using studies with multiple measurements, in which each item is scanned multiple times under identical acquisition parameters. This practice has been particularly popular in brain imaging, where many studies have been devoted to quantifying the reproducibility of different properties of the data [9–12]. However, this approach has severe limitations. Perhaps the most problematic aspect of this approach is clear from the popular adage, “garbage in, garbage out” [13]. If the measurements themselves are

<sup>1</sup> Johns Hopkins University, <sup>2</sup> Shanghai Jiaotong University, <sup>3</sup> Child Mind Institute, <sup>4</sup> Beijing Normal University, Nanjing Normal University, University of Chinese Academy of Sciences. \* Corresponding author: Joshua T. Vogelstein ([jovo@jhu.edu](mailto:jovo@jhu.edu)).

not sufficiently reproducible, then scalar summaries of the data cannot be reproducible either. This perspective, the primacy of measurement, is fundamental in statistics, so much so that one of the first modern statistics textbook was R.A. Fisher's, "The Design of Experiments" [14].

An important consideration is that quantifying reliability and reproducibility with multiple measurements may seem like a limitation for many fields, in which the end derivative typically used for inference may be just a single sample for each item measured. However, a single measurement may often consist of many sub-measurements for a single individual, each of which are combined to produce the single derivative work. For example in brain imaging, a functional Magnetic Resonance Imaging (fMRI) scan consists of tens to thousands of identical scans of the brain at numerous time points. In this case, the image can be broken into identical-width time windows. In another example taken directly from the cancer genomics experiment below, a genomics count table was produced from eight independent experiments, each of which yielded a single count table. The last step of their pre-processing procedure was to aggregate to produce the single summary derivative that the experimenters traditionally considered a single measurement. In each case, the typical "measurement" unit can really be thought of as an aggregate of multiple smaller measurement units, and a researcher can leverage these smaller measurements as a surrogate for multiple measurements. In the neuroimagine example, the fMRI scan can be segmented into identical-width sub-scans with each treated as a single measurement, and in the genomics example, the independent experiments can each be used as a single measurement.

Motivated by Fisher's work on experimental design, rather than recommending different post-data acquisition inferential techniques, or computing the reproducibility of data after collecting, we take a different approach. Specifically, we advocate for designing experiments to maximize reproducibility. Experimental design has a rich history, including in psychology [15] and neuroscience [16, 17]. The vast majority of work in experimental design, however, focuses on designing an experiment to answer a particular scientific question. In this big data age experiments are often designed to answer many questions, including questions not even considered at the time of data acquisition. How can one even conceivably design experiments to obtain data that is particularly useful for those questions?

We propose to design experiments to optimize the *discriminability* of individual items (for example, participants in a study, or samples in an experiment). To do so, we introduce the *Discr* statistic (previously referred to as "discriminability" [18]). *Discr* quantifies the degree to which multiple measurements of the same item are more similar to one another than they are to other items. This statistic has several advantages over existing statistics that one could potentially use to optimize experimental design. First, it is nonparametric, meaning that its validity does not depend on any parametric assumptions, such as Gaussianity. Second, it can readily be applied to multivariate Euclidean data, or even non-Euclidean data (such as images, text, speech, or networks). Third, it can be applied to any stage of the data science pipeline, from data acquisition to data wrangling to data inferences.

We provide a theoretical justification of this statistic, as well as several illustrative simulated examples demonstrating its potential value. The motivating example for this work, a unique brain imaging dataset generated by the Consortium for Reliability and Reproducibility (CoRR) [19], is an amalgamation of over 28 different studies, many of which were collected using different scanners, manufactured by different companies, and run by different people, using different settings. Moreover, the scanned individuals span various age ranges, sexes, and ethnicities. Nonetheless, we are interested in finding a pipeline to analyze the data such that they can be used for many different inference tasks. After evaluating nearly 200 different analysis pipelines on over 3000 scans, we determined the optimal pipeline, that is, the pipeline with the highest *Discr*. We then demonstrate that for every single dataset, on average, pipelines that achieve higher *Discr* also yield data with more information about multiple phenotypes. This is despite the fact that no phenotypic information whatsoever was incorporated into the optimal design criterion. This is in contrast with most other potential design criteria, which did not exhibit this property. To further motivate the utility of *Discr*, we conduct a similar experiment across two genomics datasets, prepared by Carcamo-Orive et al. [20] and Douville et al. [21], again showing that pipelines that achieve a higher *Discr* yield derivatives with more information about individual phenotypes. We

therefore believe optimizing experiments to improve reproducibility, specifically by maximizing `Discr`, will be useful for a wide range of disciplines and sectors. To facilitate its use, we make all of our code and data derivatives open access at <https://neurodata.io/mgc>.

## 2 Data Reproducibility Statistics

**2.1 Intra-Class Correlation** The intra-class correlation coefficient (ICC) is a commonly used data reproducibility statistic [22]. ICC is the fraction of the total variability that is across-item variability, that is, ICC is defined as the across-item variability divided by the within-item plus across-item variability. ICC has several severe limitations. First, it is univariate, meaning if the data are multidimensional, they must first be represented by univariate statistics, thereby discarding multivariate information. Second, ICC is based on an (overly simplistic) Gaussian assumption characterizing the data. Thus, any deviations from this assumption render the interpretation of the magnitude of ICC questionable, because non-Gaussian measurements that are highly reliable could yield quite low ICC.

**2.2 Image Intra-Class Correlation (I2C2)** The Image Intra-Class Correlation (I2C2) was introduced to mitigate ICC's univariate limitation [23]. Specifically, I2C2 operates on covariances matrices, rather than variances. To obtain a univariate summary of reproducibility, I2C2 operates on the trace of the covariance matrices, one of several possible strategies, similar to most multivariate analysis of variance procedures [24]. Thus, while overcoming one limitation of ICC, I2C2 still heavily leverages Gaussian assumptions of the data to justify its validity. We introduce a complementary multivariate parametric generalization of ICC which we call Principle Component Intra-Class Correlation (PICC). PICC is simply ICC computed on the the first principle component of the data. The main advantage of PICC over I2C2 is conceptual and computational simplicity; empirically, it performs approximately as well.

**2.3 Fingerprinting Index (FPI)** The Fingerprinting Index (FPI) [25, 26] provides a metric for discovering individual-specific connectivity profiles in resting-state MRI (fMRI). Specifically, FPI operates on the pairwise correlation of the vectorized connectivity matrices. A high FPI corresponds to the connectivity matrices being more strongly correlated within-subject versus between-subject. Unlike the strategies employed in this manuscript, the FPI produces a statistic for each possible ordering of 2 measurement sessions; ie, if each item is measured  $s$  times, FPI produces  $s(s - 1)$  statistics. To ease the utility of FPI for assessing the effectiveness of a strategy, we instead propose the usage of the FPI averaged across all  $s(s - 1)$  statistics, which we use for the duration of this manuscript (denoted AFPI).

**2.4 Distance Components (DISCO)** Distance Components (DISCO) [27] extends the classical Analysis of Variance (ANOVA) framework to cases where the distributions are not necessarily Gaussian. In contrast to ANOVA which makes simplifying assumptions of normality, DISCO operates on the dispersion of the samples based on the Euclidean Distance, comparing the within-class dispersion to the between-class dispersion. DISCO produces a consistent test against general alternatives as the number of observations  $s$  per item goes to infinity. Note that in many real data scenarios,  $s$  is small (particularly, most "repeat measurements" datasets have  $s = 2$ ), and the finite-sample performance of DISCO on such a small number of repeat trials is not known.

**2.5 Maximum Mean Discrepancy (MMD)** Maximum mean discrepancy (MMD) [28] provides a non-parametric framework for comparing whether two samples are drawn from the same distribution. MMD subverts Gaussian assumptions by embedding the points in a reproducing kernel Hilbert Space (RKHS), and looking for functions over the unit ball in the RKHS which maximize the difference in the means of the embedded points. In the two-item regime, MMD can be shown to be equivalent to the Hilbert-Schmidt Independence Criterion (HSIC) [29–31], which provides a natural generalization of MMD when the number of classes exceeds two.

**2.6 Discr** Our main contribution is the introduction of a nonparametric multivariate (and non-Euclidean) data reproducibility statistic which we call `Discr`. `Discr` quantifies the degree to which multiple measurements of the same item are more similar to one another than they are to other items, without making

any parametric assumptions, and without requiring the data to be univariate. Here we outline how one can compute `Discr` from data.

Consider  $n$  items, where each item has  $s$  measurements, resulting in  $N = n \times s$  total measurements across items, then `Discr` can be computed as follows:

1. Compute the distance between all pairs of samples (resulting in an  $N \times N$  matrix).
2. For all samples of all items, compute the fraction of times that a within-item distance is smaller than an across-item distance.
3. The `Discr` of the dataset is the average of the above mentioned fraction.

A high `Discr` indicates that within-item measurements are more similar to one another than across-item measurements. For more algorithmic details, see Algorithm 1. For formal definition of terms, see Appendix A.

**3 Theoretical properties of `Discr`** Under reasonably general assumptions, if within-item variability increases, predictive accuracy will decrease. Therefore, a statistic that is sensitive to within-item variance is desirable for optimal experimental design, regardless of the distribution of the data. Carmines and Zeller [32] introduces a univariate parametric framework in which predictive accuracy can be lower-bounded by a decreasing function of ICC; as a direct consequence, a strategy with a higher ICC will, on average, have higher predictive performance on subsequent inference tasks. Unfortunately, this valuable theoretical result is limited in its applicability, as it is restricted to univariate data, whereas big data analysis strategies often produce multivariate data. We therefore prove the following generalization of this theorem (see Appendix B for proof):

**Theorem 3.1.** *Under the multivariate additive noise setting, `Discr` provides a lower bound on the predictive accuracy of a subsequent classification task. Consequently, a strategy with a higher `Discr` provably provides a higher bound on predictive accuracy than a strategy with a lower `Discr`.*

Thus, `Discr` provides a theoretical extension of ICC to a multivariate model, and correspondingly, motivates optimizing experiments to obtain higher `Discr`.

## 4 Empirical properties of `Discr` on simulated data

**4.1 Simulation settings** To develop insight into the performance of `Discr`, we consider several different simulation settings (see Appendix D for details). Each setting includes between 2 and 20 items, with 128 total measurements, in two dimensions. Figure 1A shows a two-dimensional scatterplot of each setting, and Figure 1B shows the Euclidean distance matrix between samples, ordered by item:

1. **Gaussian** Sixteen items are each distributed according to a spherically symmetric Gaussian, therefore respecting the assumptions that motivate ICC and I2C2.
2. **Cross** Two items have Gaussian distributions with the same mean and different diagonal covariance matrices.
3. **Ball/Circle** One item is distributed in the unit ball, the other on the unit circle; Gaussian noise is added to both.
4. **XOR** Each of two items is a mixture of two spherically symmetric Gaussians, but means are organized in an XOR fashion; that is, the means of the first item are  $(0, 1)$  and  $(1, 0)$ , whereas the means of the second are  $(0, 0)$  and  $(1, 1)$ . The implication is that many measurements from a given item are further away than any measurement of the other item.
5. **No Signal** Both items have the same Gaussian distribution.

We evaluate the three statistics that we developed: `Discr`, `PICC`, and `AFPI` to previously existing statistics, including I2C2 and MMD.

**4.2 `Discr` empirically predicts performance on subsequent inference tasks** We investigate the sensitivity of the reproducibility statistics to changes in within-item variability in each of the settings. Figure 1C shows the impact of increasing within-item variance on the different simulation settings. For those with predictive information (the top four), increasing variance decreases predictive accuracy (green line). As desired, `Discr` also decreases nearly perfectly monotonically with decreasing variances. However, only in the first setting, where each item has a spherically symmetric Gaussian

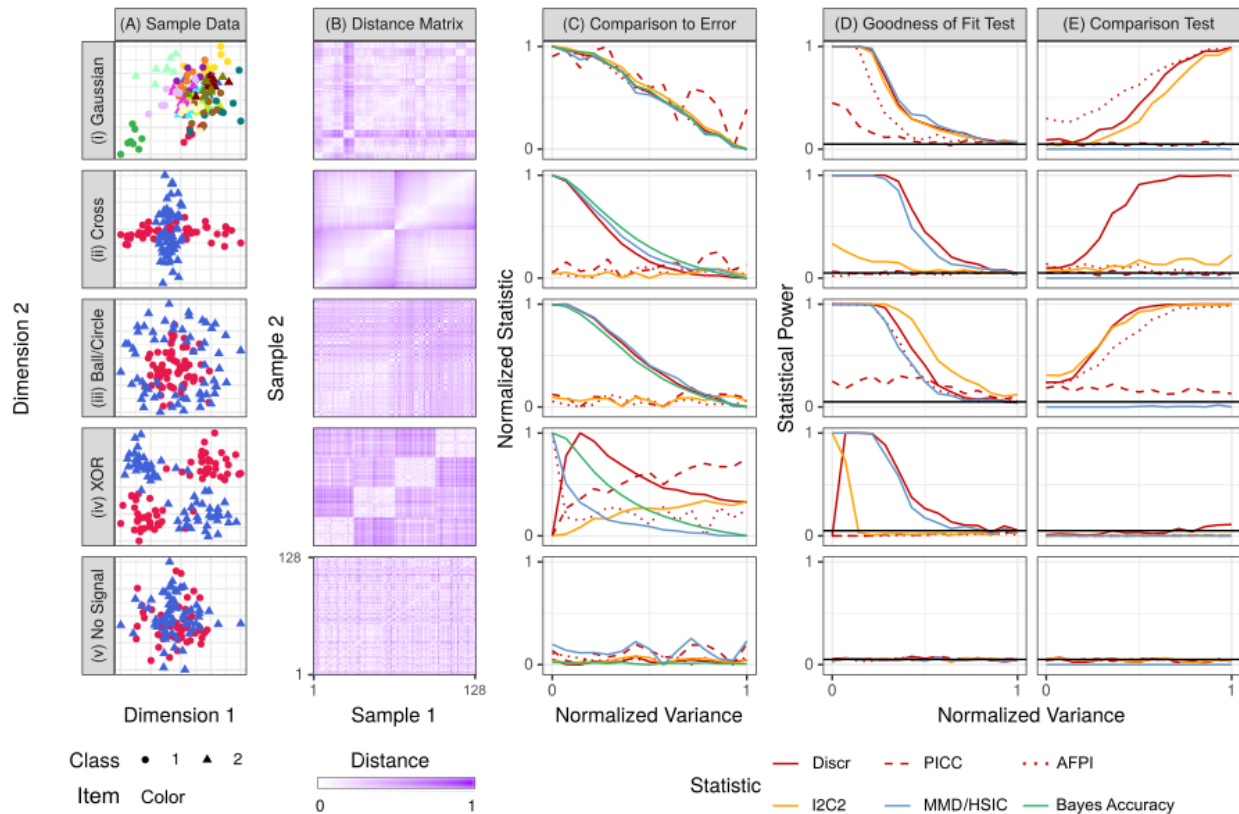

Figure 1: **Five simulated settings demonstrate the value of Discr for optimal experimental design.** All simulations are two-dimensional, with 128 samples, and  $\alpha = 0.05$ , with 500 iterations per setting. For all simulations, the variance is normalized (Appendix D for details). **(A)** For each setting, class label is indicated by shape, and color indicates item identity. **(B)** Euclidean distance matrix between samples within each simulation setting. Samples are organized by item. Simulation settings in which items are discriminable tend to have a block structure where samples from the same item are relatively similar to one another. **(C)** Reproducibility statistic versus variance. Here, we can compute the Bayes accuracy (the best one could perform to predict class label) as a function of variance. Discr and MMD are mostly monotonic relative to within-item variance across all settings, suggesting that one can predict improved performance via improved Discr. **(D)** goodness of fit test of whether data are discriminable. Discr achieves nearly as high or higher power than alternative strategies in all cases. **(E)** comparison test of which approach is more discriminable. Discr achieves highest power for all settings and variances for most settings and variances.

distribution, do I2C2, PICC, and AFPI drop proportionally. Even in the second (Gaussian) setting, I2C2, PICC, and AFPI are effectively uninformative about the within-item variance. And in the third and fourth (non-Gaussian) settings, they are similarly useless. This suggests that of these statistics, only Discr and MMD can serve as satisfactory surrogates for predictive accuracy under these relatively simple settings.

**4.3 A goodness of fit test for Discr** A prerequisite for making item-specific predictions is that items are different from one another in predictable ways, that is, are discriminable. If not, the same assay applied to the same individual on multiple trials could yield in unacceptably highly variable results. Thus, prior to embarking on a machine learning search for predictive accuracy, one can simply test whether the data are discriminable at all. If not, predictive accuracy will be hopeless. Letting  $S$  denote the Discr of a dataset with  $n$  items and  $s$  measurements per item, and  $S_0$  denote the Discr of the

same size dataset with zero item specific information, the goodness of fit hypothesis test for `Discr` is

$$(1) \quad \begin{aligned} H_0 : D &= D_0, \\ H_A : D &> D_0. \end{aligned}$$

One could replace  $D$  for `Discr` with some other test statistic, such as PICC or I2C2. We devised a permutation test to obtain a distribution of the test statistic under the null, and a corresponding p-value. To evaluate the different procedures, we compute the power of each test, that is, the probability of correctly rejecting the null when it is false (which is one minus type II error; see Appendix C.1 for details).

Figure 1D shows that `Discr` achieves as high or higher power than all competing approaches in essentially all settings and variances. This result demonstrates that despite the fact that `Discr` does not rely on Gaussian assumptions, it still performs as well or better than parametric methods when the data satisfy these assumptions. In the cross setting, only `Discr` and MMD correctly identify that items differ from one another, despite the fact that the data are Gaussian. In both ball/disc and XOR settings, most statistics perform well despite the non-Gaussianity of the data. And when there is no signal, all tests are valid, achieving power less than or equal to the critical value. Non-parametric `Discr` therefore has the power of parametric approaches for data at which those assumptions are appropriate, and much higher power for other data. Though MMD performs comparably to `Discr` here, it does not consistently perform well in the below comparison test evaluations.

#### 4.4 A comparison test for whether one experimental design is more discriminable than another

Given two experimental designs—which can differ either by acquisition and/or analysis details—are the measurements produced by one method more discriminable than the other? Letting  $D^{(1)}$  be the `Discr` of the first approach, and  $D^{(2)}$  be the `Discr` of the second approach, we have the following comparison hypothesis for `Discr`:

$$(2) \quad \begin{aligned} H_0 : D^{(1)} &= D^{(2)}, \\ H_A : D^{(1)} &> D^{(2)}. \end{aligned}$$

Again, one could replace `Discr` with other test statistics, and we devised a permutation test to obtain the distribution of the test statistic under the null, and p-values (see Appendix C.2 for details). Figure 1D shows `Discr` achieves nearly as high or higher power than the other approaches. Specifically, only AFPI achieves higher power in the Gaussian setting, but it achieves almost no power in the cross setting. MMD achieves extremely low power for all settings, as does PICC. I2C2 achieves similar power to `Discr` only for the Gaussian and ball/disc setting. All tests are valid in that they achieve a power approximately equal to or below the critical value when there is no signal. The fact that `Discr` achieves nearly equal or higher power than the statistics that build upon Gaussian methods, even under Gaussian assumptions, suggests that `Discr` will be a superior metric for optimal experimental design.

## 5 Empirical `Discr` on Real Data

**5.1 Human brain imaging data acquisition and analysis** Consortium for Reliability and Reproducibility (CoRR) [33] has generated functional, anatomical, and diffusion magnetic resonance imaging (dMRI) scans from >1,600 participants, often with multiple measurements, collected through 28 different studies (22 of which have both age and sex annotation) spanning over 20 sites. Each of the sites use different scanners, technicians, and scanning protocols, thereby representing a wide variety of different acquisition settings with which one can test different analysis pipelines. Figure 2A shows the six stage sequence of analysis steps for converting the raw fMRI data into networks or connectomes, that is, estimates of the strength of connections between all pairs of brain regions. At each stage of the pipeline, we consider several different “standard” approaches, that is, approaches that have previously been proposed in the literature, typically with hundreds or thousands of citations [34]. Moreover, they have all been collected into an analysis engine, called Configurable Pipeline for the Analysis of Connectomes (C-PAC) [35]. In total, for the six stages together, we consider  $2 \times 2 \times 2 \times 2 \times 4 \times 3 = 192$  different

analysis pipelines. Because each stage is nonlinear, it is possible that the best sequence of choices is not equivalent to the best choices on their own. For this reason, publications that evaluate a given stage using any metric, could result in misleading conclusions if one is searching for the best sequence of steps. The dMRI connectomes were acquired via 48 analysis pipelines using the Neurodata MRI Graphs (ndmg) pipeline [36]. Appendix E provides specific details for both fMRI and dMRI analysis, as well as the options attempted.

**5.2 Different analysis strategies yield widely disparate stabilities** Figure 2B shows the analysis strategy has a large impact on the *Discr* of the resulting fMRI connectomes. Each column shows one of 64 different analysis strategies, ordered by how significantly different they are from the pipeline with highest *Discr* (averaged over all datasets, tested using the above comparison test). Interestingly, pipelines with worse average *Discr* also tend to have higher variance across datasets. The best pipeline, FNNNCP, uses FSL registration, no frequency filtering, no scrubbing, no global signal regression, CC200 parcellation, and converts edges weights to ranks. While all strategies across all datasets with multiple participants are discriminable at  $\alpha = 0.05$  (*Discr* goodness of fit test), the majority of the strategies ( $51/64 \approx 80\%$ ) show significantly worse *Discr* than the optimal strategy at  $\alpha = 0.05$  (*Discr* comparison test).

**5.3 *Discr* identifies which acquisition and analysis decisions are most important for improving performance** While the above analysis provides evidence for which *sequence* of analysis steps is best, it does not provide information about which choices individually have the largest impact on overall *Discr*. To do so, it is inadequate to simply fix a pipeline and only swap out algorithms for a single stage, as such an analysis will only provide information about that fixed pipeline. Therefore, we evaluate each choice in the context of all 192 considered pipelines in Figure 3A. The pipeline constructed by identifying the best option for each analysis stage is FNNGCP (Figure 3A). Although it is not exactly the same as the pipeline with highest *Discr* (FNNNCP), it is also not much worse (*Discr* 2-sample test,  $p$ -value  $\approx 0.14$ ). Moreover, except for scrubbing, each stage has a significant impact on *Discr* after correction for multiple hypotheses (Wilcoxon signed-rank statistic,  $p$ -values all  $< 0.001$ ).

Another choice is whether to estimate connectomes using functional or diffusion MRI (Figure 3B). Whereas both data acquisition strategies have known problems [37], the *Discr* of the two experimental modalities has not been directly compared. Using four datasets from CoRR that acquired both fMRI and dMRI on the same subjects, and have quite similar demographic profiles, we tested whether fMRI or dMRI derived connectomes were more discriminable. The pipelines being considered were the best-performing fMRI pre-processing pipeline (FNNNCP) against the dMRI pipeline with the CC200 parcellation. For three of the four datasets, dMRI connectomes were more discriminable. This is not particularly surprising, given the susceptibility of fMRI data to changes in state rather than trait (e.g., amount of caffeine prior to scan [35]).

The above results motivate investigating which aspects of the dMRI analysis strategy were most effective. We focus on two criteria: how to scale the weights of connections, and how many regions of interest (ROIs) to use. For scaling the weights of the connections, we consider three possible criteria: using the raw edge-weights (“Raw”), taking the log of the edge-weights (“Log”), and ranking the non-zero edge weights in sequentially increasing order (“Rank”). Figure 3C.i shows that both rank and log transform significantly exceed raw edge weights (Wilcoxon signed-rank statistic, sample size = 60,  $p$ -values all  $< 0.001$ ). Figure 3C.ii shows that parcellations with larger numbers of ROIs tend to have higher *Discr*. Unfortunately, most parcellations with semantic labels (e.g., visual cortex) have hundreds not thousands of parcels. This result therefore motivates the development of more refined semantic labels.

**5.4 Optimizing *Discr* improves downstream inference performance** We next examined the relationship between the *Discr* of each pipeline, and the amount of information it preserves about two properties of interest: sex and age. Based on the simulations above, we expect that analysis pipelines with higher *Discr* will yield connectomes with more information about covariates. Indeed, Figure 4

(A) Processing Strategies Evaluated

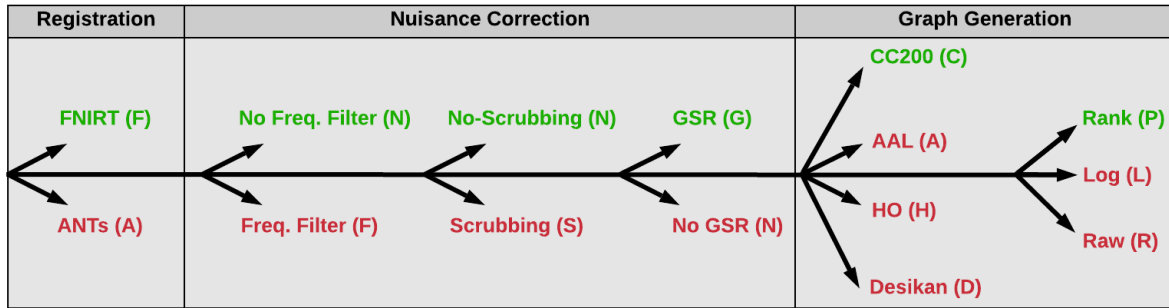

(B) Comparing Discriminability Across 64 Preprocessing Strategies

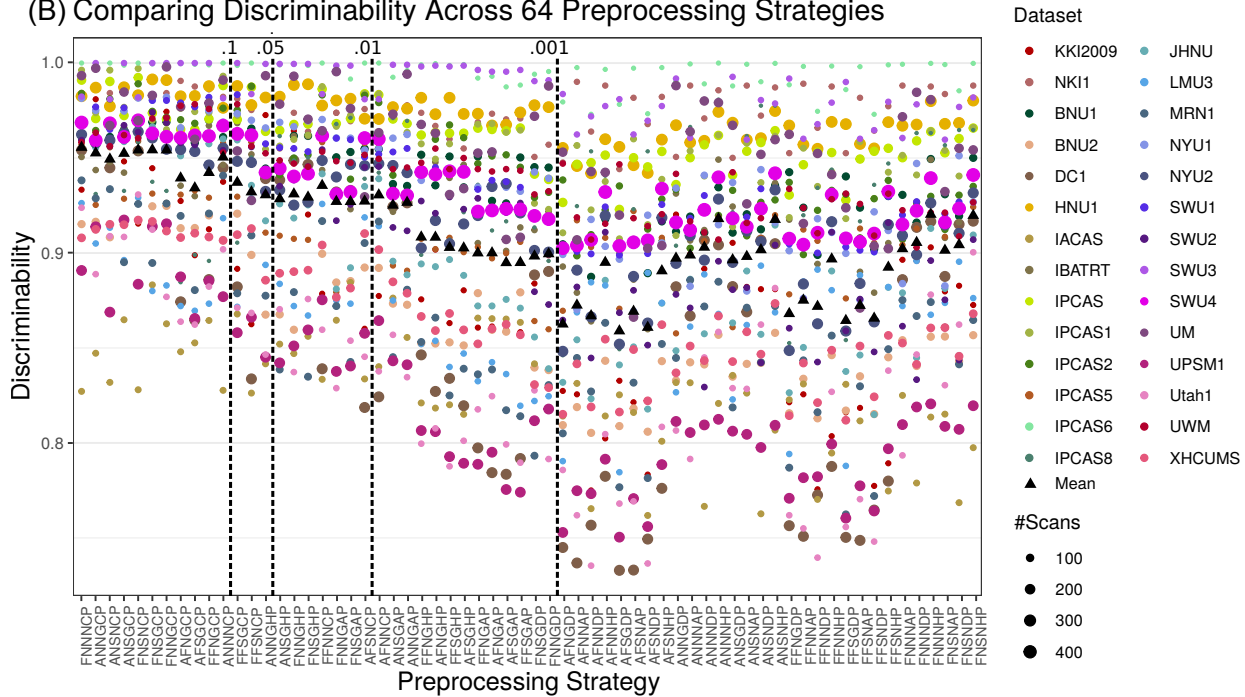

Figure 2: **Different analysis strategies yield widely disparate stabilities.** (A) Illustration of analysis options for the 192 fMRI pipelines under consideration (described in Appendix E). The optimal choices are green. (B) *Discr* of fMRI Connectomes analyzed using 64 different pipelines. Functional correlation matrices are estimated from 28 multi-session studies from the CoRR dataset using each pipeline. The analysis strategy codes are assigned sequentially according to the abbreviations listed for each step in (A). The mean *Discr* per pipeline is a weighted sum of its stabilities across datasets. Each pipeline is compared to the optimal pipeline with the highest mean *Discr*, FNNNCP, using the above comparison hypothesis test. The remaining strategies are arranged according to *p*-value, indicated in the top row.

shows that, for virtually every single dataset including sex and age annotation (22 in total), a pipeline with higher *Discr* tends to preserve more information about both covariates. The amount of information is quantified by the effect size of the distance correlation  $DCorr$  (which is exactly equivalent to MMD [38, 39]), a statistic that quantifies the magnitude of association for both linear and nonlinear dependence structures. In contrast, if one were to use either PICC, DISCO, or I2C2 to select the optimal pipeline, for many datasets, subsequent predictive performance would degrade. AFPI performs similarly to *Discr* on this dataset. These results are highly statistically significant: the slopes of effect size versus *Discr* and AFPI across datasets are significantly positive for both age and sex in 82 and 95 percent of all studies, respectively (robust  $Z$ -test,  $\alpha = 0.05$ ). DISCO performs poorly, basically always, because *k*-sample tests are designed to perform well with many samples from a small number of differ-



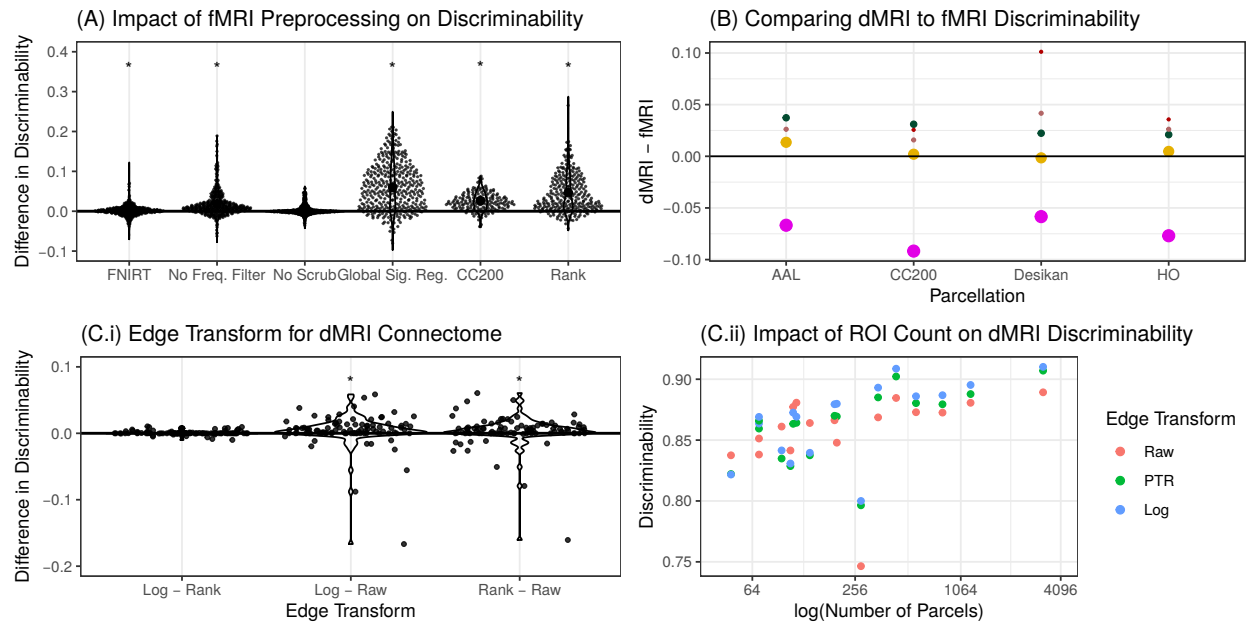

**Figure 3: Parsing the relative impact on Discr of various acquisition and analytic choices.** (A) The pipelines are aggregated for a particular analysis step, with pairwise comparisons with the remaining analysis options held fixed. The beeswarm plot shows the difference between the overall best performing option and the second best option for each stage (mean in bigger black dot); the  $x$ -axis label indicates the best performing strategy. The best strategies are FNIRT, no frequency filtering, no scrubbing, global signal regression, the CC200 parcellation, and ranks edge transformation. A Wilcoxon signed-rank test is used to determine whether the mean for the best strategy exceeds the second best strategy: a \* indicates that the  $p$ -value is at most 0.001 after Bonferroni correction. Of the best options, only no scrubbing is *not* significantly better than alternative strategies. Note that the options that perform marginally the best are not significantly different than the best performing strategy overall, as shown in Figure 2. (B) A comparison of the stabilities for the 4 datasets with both fMRI and dMRI connectomes. dMRI connectomes tend to be more discriminable, in 14 of 20 total comparisons. (C.i) Comparing raw edge weights (Raw), ranking (Rank), and log-transforming the edge-weights (Log) for the diffusion connectomes, the Log and Rank transformed edge-weights tend to show higher Discr than Raw. (C.ii) As the number of ROIs increases, the Discr tends to increase.

ent populations, and questions of reproducibility across repeated measurements have a few samples across many different populations.

**5.5 Discr in Genomics** The first genomics study aimed to explore variation in gene expression across human induced pluripotent stem cell (hiPSC) lines [20], and includes RNAseq data from 101 healthy individuals, comprising 38 males and 63 females. Expression was interrogated across donors by studying between one and seven replicated iPSC lines from each donor, yielding bulk RNAseq data from a total of 317 individual hiPSC lines. While the pipeline includes many steps, we focus here for simplicity on (1) counting, and (2) normalizing. The two counting approaches we study are the raw hiPSC lines and the count-per-million (CPM). Given counts, we consider four different normalization options: raw, rank, and log-transformed (as described above), as well as to mean-centering (normalizing each sample to have an average count of 0). The task of interest was to identify the sex of the individual.

The second genomics study [21] includes 331 individuals, consisting of 135 patients with non-metastatic cancer and 196 healthy controls, each with eight DNA samples. The study leverages a PCR-based assay called Repetitive element aneuploidy sequencing system to analyze  $\sim 750,000$  amplicons distributed throughout the genome to investigate the presence of aneuploidy (abnormal chromosome counts) in samples from cancer patients (see Appendix E.1 for more details). The possible processing strategies include using the raw amplicons or the amplicons downsampled by a factor of  $5 \times 10^4$  bases,

$5 \times 10^5$  bases,  $5 \times 10^6$  bases, or to the individual chromosome level (the *resolution* of the data), followed by normalizing through the previously described approaches (Raw, Rank, log-transformed) yielding  $5 \times 3 = 15$  possible strategies in total. The task of interest was to identify whether the sample was collected from a cancer patient or a healthy control.

Across both tasks, slope for discriminability is positive, and for the first task, the slope is significantly bigger than zero (robust  $Z$ -test,  $p$ -value = .001,  $\alpha = .05$ ). Similarly, for PICC, in both datasets the slope is positive and the effect is significant. Both I2C2 and DISCO do not provide value for subsequent inference. While AFPI is informative for the sex study, AFPI provides *no* information for the second study, producing a statistic of 1 for all of the processing strategies considered.

### (I) Neuroimaging

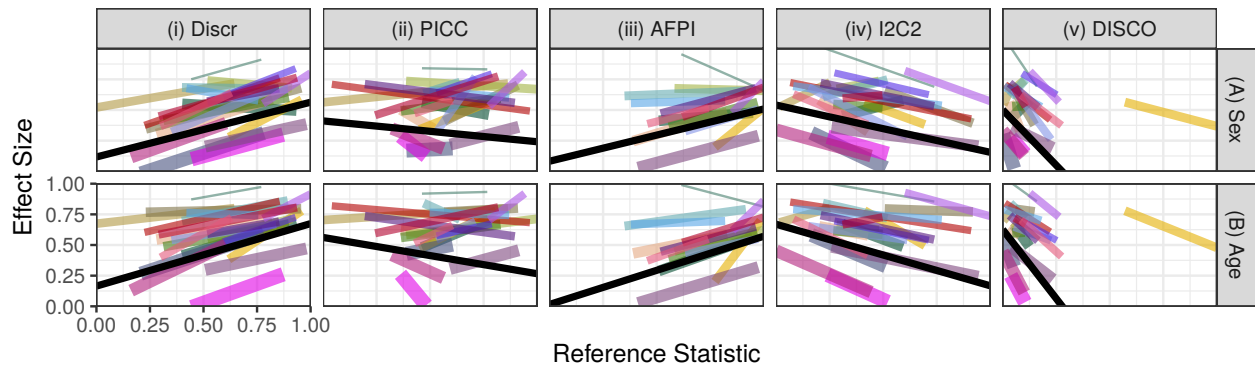

### (II) Genomics

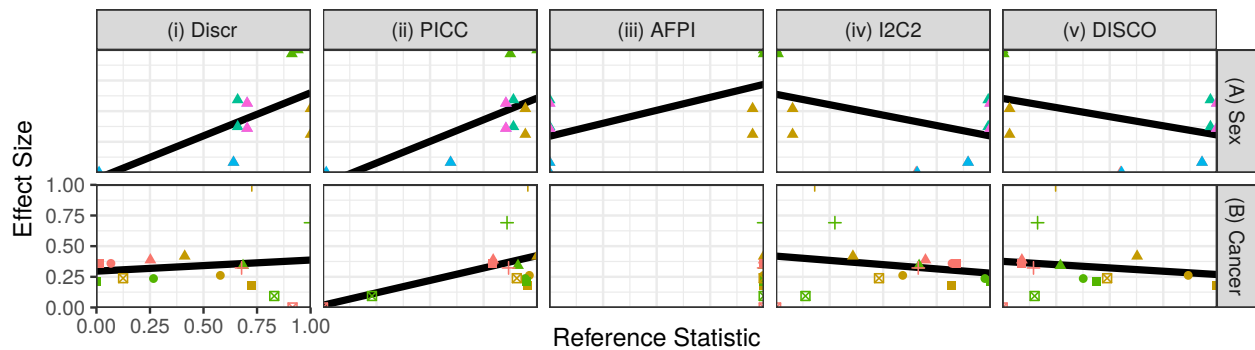

### (III) Comparison

|                      | (i) Discr |             | (ii) PICC |             | (iii) AFPI |             | (iv) I2C2 |             | (v) DISCO |             | #Studies |
|----------------------|-----------|-------------|-----------|-------------|------------|-------------|-----------|-------------|-----------|-------------|----------|
|                      | Slope>0   | p-value<.05 | Slope>0   | p-value<.05 | Slope>0    | p-value<.05 | Slope>0   | p-value<.05 | Slope>0   | p-value<.05 |          |
| (I.A) Sex, Neuro     | 0.82      | 0.82        | 0.59      | 0.5         | 0.75       | 0.69        | 0.27      | 0.23        | 0.27      | 0.23        | 22       |
| (I.B) Age, Neuro     | 0.95      | 0.95        | 0.68      | 0.59        | 0.81       | 0.75        | 0.09      | 0.09        | 0.09      | 0.05        | 22       |
| (II.A) Sex, Genom    | 1         | 1           | 1         | 1           | 1          | 1           | 0         | 0           | 0         | 0           | 1        |
| (II.B) Cancer, Genom | 1         | 0           | 1         | 1           | 0          | 0           | 0         | 0           | 0         | 0           | 1        |
| Total                | 0.89      | 0.87        | 0.65      | 0.57        | 0.76       | 0.71        | 0.17      | 0.15        | 0.17      | 0.13        | 46       |

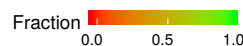

Figure 4: **Optimizing Discr improves downstream inference performance.** Using the connectomes from the 64 pipelines with raw edge-weights, we examine the relationship between connectomes vs sex and age. The columns evaluate difference approaches for computing pipeline effectiveness, including **(i) Discr**, **(ii) PICC**, **(iii) Average Fingerprint Index AFPI**, **(iv) I2C2**, and **(v) DISCO**. Each panel shows reference pipeline effectiveness (*x-axis*) versus effect size (*y-axis*). Both the *x* and *y* axes are normalized by the minimum and maximum statistic. For each study, the effect size is regressed onto the statistic of interest. Color and line width correspond to the study and number of scans, respectively (see Figure 2B). The solid black line is the weighted mean over all studies. Discr is the only statistic in which *all* slopes are positive. Moreover, the corrected *p*-value [40, 41] is significant across datasets for both covariates (all *p*-values < .001). This indicates that pipelines with higher Discr correspond to larger effect sizes for the covariate of interest, and that this relationship is stronger for Discr than other statistics. A similar experiment is performed on two genomics datasets, measuring the effects due to sex and whether an individual has cancer. Each point represents a single processing strategy (there is only one dataset per covariate). **(III)** indicates the fraction of datasets with positive slopes and with significantly positive slopes, ranging from 0 (“None”, red) to 1 (“All”, green), at both the task and aggregate level. Discr is the statistic where the most datasets have positive slopes, and the statistic where the most datasets have significantly positive slopes, across the neuroimaging and genomics datasets considered. Appendix E.2 details the methodologies employed.

**6 Discussion** We propose the use of the `Discr` statistic as a simple and intuitive measure for experimental design featuring multiple measurements. Numerous efforts have established the value of *quantifying* reliability, repeatability, and replicability (or discriminability) using parametric measures such as ICC and I2C2. However, they have not been used to optimize reproducibility—that is, they are only used post-hoc to determine reproducibility, not used as criteria for searching over the design space—nor have non-parametric multivariate generalizations of these statistics been available. We derive goodness of fit and comparison (equality) tests for `Discr`, and demonstrate via theory and simulation that `Discr` provides numerous advantages over existing techniques across a range of simulated settings. Our neuroimaging and genomics use-cases exemplify the utility of these features of the `Discr` framework for optimal experimental design.

`Discr` provides a number of connections with related statistical algorithms worth further consideration. `Discr` is related to energy statistics [42], in which the statistic is a function of distances between observations [43]. Energy statistics provide approaches for goodness-of-fit (one-sample) and equality testing (two-sample), and multi-sample testing [27]. However, we note an important distinction: a goodness of fit test for discriminability can be thought of as a  $K$ -sample test in the classical literature, and a comparison of discriminabilities is analogous to a comparison of  $K$ -sample tests. Further, similar to `Discr`, energy statistics make relatively few assumptions. However, energy statistics requires a large number of measurements per item, which is often unsuitable for biological data where we frequently have only a small number of repeated measurements. `Discr` is most closely related to multiscale generalized correlation (MGC) [38, 39], which combines energy statistics with nearest neighbors, as does `Discr`. Like many energy-based statistics, `Discr` relies upon the construction of a distance matrix. As such, `Discr` generalizes readily to high-dimensional data, and many packages accelerate distance computation in high-dimensionals [44].

**Limitations** While `Discr` provides experimental design guidance for big data, other considerations may play a role in a final determination. For example, the connectomes analyzed here are *resting-state*, as opposed to *task-based* fMRI connectomes. Recent literature suggests that the global signal in a rs-fMRI scan may be a nuisance variable for task-based approaches [45, 46]. Thus, while `Discr` is an effective tool for experimental design, knowledge of the techniques in conjunction with the inference task is still a necessary component of any investigation. Further, in this study, we only consider the Euclidean distance, which may not be appropriate for all datasets of interest. For example, if the measurements live in a manifold (such as images, text, speech, and networks), one may be interested in dissimilarity or similarity functions other than Euclidean distance. To this end, `Discr` readily generalizes to alternative comparison functions, and will produce an informative result as long as the choice of comparison function is appropriate for the measurements.

It is important to emphasize that `Discr`, as well the related statistics, are neither necessary, nor sufficient, for a measurement to be practically useful. For example, categorical covariates, such as sex, are often meaningful in an analysis, but not discriminable. Human fingerprints are discriminable, but typically not biologically useful. In addition, none of the statistics studied here are immune to sample characteristics, thus interpreting results across studies deserves careful scrutiny. For example, having a sample with variable ages will increase the inter-subject dissimilarity of any metric dependent on age (such as the connectome). With these caveats in mind, `Discr` remains as a key experimental design consideration a wide variety of settings.

**Conclusion** The use-cases provided herein serve to illustrate how `Discr` can be used to facilitate experimental design, and mitigate reproducibility issues. We envision that `Discr` will find substantial applicability across disciplines and sectors beyond brain imaging and genomics, such pharmaceutical research. To this end, we provide open-source implementations of `Discr` for both Python and R [47, 48]. Code for reproducing all the figures in this manuscript is available at <https://neurodata.io/mgc>.

**Acknowledgements** This work was partially supported by the National Science Foundation NEURONEX award DMS-1707298, and the Defense Advanced Research Projects Agency's (DARPA) SIM-

PLEX program through SPAWAR contract N66001-15-C-4041. X-NZ receives funding supports by the National Basic Research (973) Program (2015CB351702), the Natural Science Foundation of China (81471740, 81220108014), the China - Netherlands CAS-NWO Programme (153111KYSB20160020), Beijing Municipal Science and Tech Commission (Z161100002616023, Z171100000117012), the Major Project of National Social Science Foundation of China (14ZDB161), the National R&D Infrastructure and Facility Development Program of China, Fundamental Science Data Sharing Platform (DKA2017-12-02-21), and Guangxi BaGui Scholarship (201621).

## References

- [1] Peter J Huber and Elvezio M Ronchetti. *Robust Statistics*. Wiley, 2 edition edition, February 2009.
- [2] Bin Yu. Stability. *Bernoulli*, 19(4):1484–1500, September 2013.
- [3] John P A Ioannidis. Why most published research findings are false. *PLoS Med.*, 2(8):e124, August 2005.
- [4] Monya Baker. Over half of psychology studies fail reproducibility test. *Nature Online*, August 2015.
- [5] Prasad Patil, Roger D Peng, and Jeffrey T Leek. What Should Researchers Expect When They Replicate Studies? A Statistical View of Replicability in Psychological Science. *Perspect. Psychol. Sci.*, 11(4):539–544, July 2016.
- [6] David Trafimow and Michael Marks. Editorial. *Basic Appl. Soc. Psych.*, 37(1):1–2, January 2015.
- [7] Ronald D Fricker, Katherine Burke, Xiaoyan Han, and William H Woodall. Assessing the Statistical Analyses Used in Basic and Applied Social Psychology After Their p-Value Ban. *Am. Stat.*, 73(sup1):374–384, March 2019.
- [8] Ronald L Wasserstein, Allen L Schirm, and Nicole A Lazar. Moving to a World Beyond “ $p < 0.05$ ”. *Am. Stat.*, 73(sup1):1–19, March 2019.
- [9] Xi-Nian Zuo, Jeffrey S Anderson, Pierre Bellec, Rasmus M Birn, Bharat B Biswal, Janusch Blautzik, John C S Breitner, Randy L Buckner, Vince D Calhoun, F Xavier Castellanos, Antao Chen, Bing Chen, Jiangtao Chen, Xu Chen, Stanley J Colcombe, William Courtney, R Cameron Craddock, Adriana Di Martino, Hao-Ming Dong, Xiaolan Fu, Qiyong Gong, Krzysztof J Gorgolewski, Ying Han, Ye He, Yong He, Erica Ho, Avram Holmes, Xiao-Hui Hou, Jeremy Huckins, Tianzi Jiang, Yi Jiang, William Kelley, Clare Kelly, Margaret King, Stephen M LaConte, Janet E Lainhart, Xu Lei, Hui-Jie Li, Kaiming Li, Kuncheng Li, Qixiang Lin, Dongqiang Liu, Jia Liu, Xun Liu, Yijun Liu, Guangming Lu, Jie Lu, Beatriz Luna, Jing Luo, Daniel Lurie, Ying Mao, Daniel S Margulies, Andrew R Mayer, Thomas Meindl, Mary E Meyerand, Weizhi Nan, Jared A Nielsen, David O’Connor, David Paulsen, Vivek Prabhakaran, Zhigang Qi, Jiang Qiu, Chunhong Shao, Zarrar Shehzad, Weijun Tang, Arno Villringer, Huiling Wang, Kai Wang, Dongtao Wei, Gao-Xia Wei, Xu-Chu Weng, Xuehai Wu, Ting Xu, Ning Yang, Zhi Yang, Yu-Feng Zang, Lei Zhang, Qinglin Zhang, Zhe Zhang, Zhiqiang Zhang, Ke Zhao, Zonglei Zhen, Yuan Zhou, Xing-Ting Zhu, and Michael P Milham. An open science resource for establishing reliability and reproducibility in functional connectomics. *Sci Data*, 1: 140049, December 2014.
- [10] David O’Connor, Natan Vega Potler, Meagan Kovacs, Ting Xu, Lei Ai, John Pellman, Tamara Vanderwal, Lucas C Parra, Samantha Cohen, Satrajit Ghosh, Jasmine Escalera, Natalie Grant-Villegas, Yael Osman, Anastasia Bui, R Cameron Craddock, and Michael P Milham. The Healthy Brain Network Serial Scanning Initiative: a resource for evaluating inter-individual differences and their reliabilities across scan conditions and sessions. *Gigascience*, 6(2):1–14, February 2017.
- [11] Xi-Nian Zuo, Ting Xu, and Michael Peter Milham. Harnessing reliability for neuroscience research. *Nat Hum Behav*, 3(8):768–771, August 2019.
- [12] Aki Nikolaidis, Anibal Solon Heinsfeld, Ting Xu, Pierre Bellec, Joshua Vogelstein, and Michael Milham. Bagging Improves Reproducibility of Functional Parcellation of the Human Brain. July 2019.
- [13] David J Hand. *Measurement: A Very Short Introduction*. Oxford University Press, 1 edition edition, 2016.
- [14] Ronald A Fisher. *The Design of Experiments*. Macmillan Pub Co, 1935.

- [15] R E Kirk. Experimental Design. In Irving Weiner, editor, *Handbook of Psychology, Second Edition*, volume 12, page 115. John Wiley & Sons, Inc., Hoboken, NJ, USA, September 2012.
- [16] Anders M Dale. Optimal experimental design for event-related fmri. *Human brain mapping*, 8(2-3): 109–114, 1999.
- [17] Liam Paninski. Asymptotic theory of information-theoretic experimental design. *Neural Comput.*, 17(7):1480–1507, July 2005.
- [18] S Wang, Z Yang, M Milham, C Craddock, X-N Zuo, C E Priebe, and J T Vogelstein. Optimal Experimental Design for Generating Reference Connectome Datasets. In *Organization for Human Brain Mapping*, June 2015.
- [19] Xi-Nian Zuo, Jeffrey S Anderson, Pierre Bellec, Rasmus M Birn, Bharat B Biswal, Janusch Blautzik, John CS Breitner, Randy L Buckner, Vince D Calhoun, F Xavier Castellanos, et al. An open science resource for establishing reliability and reproducibility in functional connectomics. *Scientific data*, 1:140049, 2014.
- [20] Ivan Carcamo-Orive, Gabriel E. Hoffman, Paige Cundiff, Noam D. Beckmann, Sunita L. D’Souza, Joshua W. Knowles, Achchhe Patel, Dimitri Papatsenko, Fahim Abbasi, Gerald M. Reaven, Sean Whalen, Philip Lee, Mohammad Shahbazi, Marc Y. R. Henrion, Kuixi Zhu, Sven Wang, Panos Roussos, Eric E. Schadt, Gaurav Pandey, Rui Chang, Thomas Quertermous, and Ihor Lemischka. Analysis of Transcriptional Variability in a Large Human iPSC Library Reveals Genetic and Non-genetic Determinants of Heterogeneity. *Cell Stem Cell*, 20(4):518–5329, Apr 2017. ISSN 1875-9777. doi: 10.1016/j.stem.2016.11.005.
- [21] Christopher Douville, Joshua D. Cohen, Janine Ptak, Maria Popoli, Joy Schaefer, Natalie Silliman, Lisa Dobbyn, Robert E. Schoen, Jeanne Tie, Peter Gibbs, Michael Goggins, Christopher L. Wolfgang, Tian-Li Wang, Ie-Ming Shih, Rachel Karchin, Anne Marie Lennon, Ralph H. Hruban, Cristian Tomasetti, Chetan Bettgowda, Kenneth W. Kinzler, Nickolas Papadopoulos, and Bert Vogelstein. Assessing aneuploidy with repetitive element sequencing. *Proc. Natl. Acad. Sci. U.S.A.*, 117(9): 4858–4863, Mar 2020. ISSN 0027-8424. doi: 10.1073/pnas.1910041117.
- [22] Patrick E Shrout and Joseph L Fleiss. Intraclass correlations: uses in assessing rater reliability. *Psychological bulletin*, 86(2):420, 1979.
- [23] H Shou, A Eloyan, S Lee, V Zipunnikov, AN Crainiceanu, MB Nebel, B Caffo, MA Lindquist, and CM Crainiceanu. Quantifying the reliability of image replication studies: the image intraclass correlation coefficient (i2c2). *Cognitive, Affective, & Behavioral Neuroscience*, 13(4):714–724, 2013.
- [24] Carl J Huberty and Stephen Olejnik. *Applied MANOVA and Discriminant Analysis*. John Wiley & Sons, May 2006.
- [25] Emily S. Finn, Xilin Shen, Dustin Scheinost, Monica D. Rosenberg, Jessica Huang, Marvin M. Chun, Xenophon Papademetris, and R. Todd Constable. Functional connectome fingerprinting: Identifying individuals based on patterns of brain connectivity. *Nat. Neurosci.*, 18(11):1664, Nov 2015. doi: 10.1038/nm.4135.
- [26] Emily S Finn, Dustin Scheinost, Daniel M Finn, Xilin Shen, Xenophon Papademetris, and R Todd Constable. Can brain state be manipulated to emphasize individual differences in functional connectivity? *Neuroimage*, 160:140–151, October 2017.
- [27] Maria L Rizzo, Gábor J Székely, et al. Disco analysis: A nonparametric extension of analysis of variance. *The Annals of Applied Statistics*, 4(2):1034–1055, 2010.
- [28] Arthur Gretton, Karsten M. Borgwardt, Malte J. Rasch, Bernhard Schölkopf, and Alexander Smola. A Kernel Two-Sample Test. *Journal of Machine Learning Research*, 13(Mar):723–773, 2012. ISSN 1533-7928. URL <http://jmlr.csail.mit.edu/papers/v13/gretton12a.html>.
- [29] Nov 2013. URL <https://arxiv.org/abs/1207.6076.pdf>. [Online; accessed 23. Mar. 2020].
- [30] Cencheng Shen, Carey E. Priebe, and Joshua T. Vogelstein. The Exact Equivalence of Independence Testing and Two-Sample Testing. *arXiv*, Oct 2019. URL <https://arxiv.org/abs/1910.08883>.
- [31] Cencheng Shen and Joshua T. Vogelstein. The Exact Equivalence of Distance and Kernel Methods for Hypothesis Testing. *arXiv*, Jun 2018. URL <https://arxiv.org/abs/1806.05514>.

- [32] Edward G Carmines and Richard A Zeller. *Reliability and Validity Assessment*. SAGE Publications, November 1979.
- [33] Xi-Nian Zuo, Clare Kelly, Jonathan S Adelstein, Donald F Klein, F Xavier Castellanos, and Michael P Milham. Reliable intrinsic connectivity networks: test–retest evaluation using ica and dual regression approach. *Neuroimage*, 49(3):2163–2177, 2010.
- [34] Bharat B Biswal, Maarten Mennes, Xi-Nian Zuo, Suril Gohel, Clare Kelly, Steve M Smith, Christian F Beckmann, Jonathan S Adelstein, Randy L Buckner, Stan Colcombe, et al. Toward discovery science of human brain function. *Proceedings of the National Academy of Sciences*, 107(10): 4734–4739, 2010.
- [35] S Sikka, B Cheung, R Khanuja, S Ghosh, C Yan, Q Li, J Vogelstein, R Burns, S Colcombe, C Craddock, et al. Towards automated analysis of connectomes: The configurable pipeline for the analysis of connectomes (c-pac). In *5th INCF Congress of Neuroinformatics, Munich, Germany*, volume 10, 2014.
- [36] Gregory Kiar, Eric Bridgeford, Will Gray Roncal, Consortium for Reliability (CoRR), Reproducibility, Vikram Chandrashekar, Disa Mhembere, Sephira Ryman, Xi-Nian Zuo, Daniel S Margulies, R Cameron Craddock, Carey E Priebe, Rex Jung, Vince Calhoun, Brian Caffo, Randal Burns, Michael P Milham, and Joshua Vogelstein. A High-Throughput Pipeline Identifies Robust Connectomes But Troublesome Variability. *bioRxiv*, page 188706, apr 2018. doi: 10.1101/188706. URL <https://www.biorxiv.org/content/early/2018/04/24/188706>.
- [37] Cameron Craddock, Sharad Sikka, Brian Cheung, Ranjeet Khanuja, Satrajit S Ghosh, Chaogan Yan, Qingyang Li, Daniel Lurie, Joshua Vogelstein, Randal Burns, Stanley Colcombe, Maarten Mennes, Clare Kelly, Adriana Di Martino, Francisco X. Castellanos, and Michael Milham. Towards automated analysis of connectomes: The configurable pipeline for the analysis of connectomes (C-PAC). *Frontiers in Neuroinformatics*, July 2013.
- [38] Cencheng Shen, Carey E Priebe, and Joshua T Vogelstein. From Distance Correlation to Multiscale Generalized Correlation. *Journal of American Statistical Association*, October 2017. URL <http://arxiv.org/abs/1710.09768>.
- [39] Joshua T Vogelstein, Eric W Bridgeford, Qing Wang, Carey E Priebe, Mauro Maggioni, and Cencheng Shen. Discovering and deciphering relationships across disparate data modalities. *Elife*, 8, January 2019. URL <http://dx.doi.org/10.7554/eLife.41690>.
- [40] Ronald Aylmer Fisher. *Statistical methods for research workers*. Genesis Publishing Pvt Ltd, 1925.
- [41] Achim Zeileis. Object-oriented computation of sandwich estimators. *Journal of Statistical Software, Articles*, 16(9):1–16, 2006.
- [42] Gábor J Székely and Maria L Rizzo. Energy statistics: A class of statistics based on distances. *J. Stat. Plan. Inference*, 143(8):1249–1272, August 2013.
- [43] Maria L Rizzo and Gábor J Székely. Energy distance. *WIREs Comput Stat*, 8(1):27–38, January 2016.
- [44] Da Zheng, Disa Mhembere, Joshua T Vogelstein, Carey E Priebe, and Randal Burns. FlashR: parallelize and scale R for machine learning using SSDs. *Proceedings of the 23rd*, 53(1):183–194, February 2018. URL <https://dl.acm.org/citation.cfm?id=3178501>.
- [45] Kevin Murphy and Michael D Fox. Towards a consensus regarding global signal regression for resting state functional connectivity MRI. *Neuroimage*, 154:169–173, July 2017.
- [46] Thomas T Liu, Alican Nalci, and Maryam Falahpour. The global signal in fMRI: Nuisance or information? *Neuroimage*, 150:213–229, April 2017.
- [47] Sambit Panda, Satish Palaniappan, Junhao Xiong, Ananya Swaminathan, Sandhya Ramachandran, Eric W Bridgeford, Cencheng Shen, and Joshua T Vogelstein. mgcpy: A comprehensive high dimensional independence testing python package. July 2019.
- [48] Eric Bridgeford, Censheng Shen, Shangsi Wang, and Joshua T. Vogelstein. Multiscale generalized correlation, May 2018. URL <https://doi.org/10.5281/zenodo.1246967>.
- [49] Zeyi Wang, Eric W Bridgeford, Joshua T Vogelstein, and et al Caffo, Brian. Statistical analysis of

- data reproducibility measures.
- [50] Luc Devroye, László Györfi, and Gábor Lugosi. *A probabilistic theory of pattern recognition*, volume 31. Springer Science & Business Media, 2013.
  - [51] REAC Paley and A Zygmund. On some series of functions,(3). In *Mathematical Proceedings of the Cambridge Philosophical Society*, volume 28, pages 190–205. Cambridge Univ Press, 1932.
  - [52] Pierre A Devijver and Josef Kittler. *Pattern recognition: A statistical approach*. Prentice hall, 1982.
  - [53] Patrick E Meyers, Ganesh C Arvapalli, Sandhya C Ramachandran, Paige F Frank, Allison D Lemmer, Eric W Bridgeford, and Joshua T Vogelstein. Standardizing human brain parcellations. *Biorxiv*, October 2019.
  - [54] Stephen M Smith et al. Advances in functional and structural MR image analysis and implementation as FSL. *NeuroImage*, 23 Suppl 1:S208–19, jan 2004. ISSN 1053-8119. URL <http://www.ncbi.nlm.nih.gov/pubmed/15501092>.
  - [55] Mark W Woolrich et al. Bayesian analysis of neuroimaging data in FSL. *NeuroImage*, 45(1 Suppl):S173–86, mar 2009. ISSN 1095-9572. URL <http://www.sciencedirect.com/science/article/pii/S1053811908012044>.
  - [56] Mark Jenkinson et al. FSL. *NeuroImage*, 62(2):782–90, aug 2012. ISSN 1095-9572. URL <http://www.ncbi.nlm.nih.gov/pubmed/21979382>.
  - [57] John Mazziotta et al. A four-dimensional probabilistic atlas of the human brain. *Journal of the American Medical Informatics Association*, 8(5):401–430, 2001.
  - [58] Eleftherios Garyfallidis, Matthew Brett, Bagrat Amirbekian, Ariel Rokem, Stefan Van Der Walt, Maxime Descoteaux, and Ian Nimmo-Smith. Dipy, a library for the analysis of diffusion mri data. *Frontiers in neuroinformatics*, 8:8, 2014.
  - [59] Eleftherios Garyfallidis, Matthew Brett, Marta Morgado Correia, Guy B Williams, and Ian Nimmo-Smith. Quickbundles, a method for tractography simplification. *Frontiers in neuroscience*, 6:175, 2012.
  - [60] Disa Mhembere, William Gray Roncal, Daniel Sussman, Carey E Priebe, Rex Jung, Sephira Rymann, R Jacob Vogelstein, Joshua T Vogelstein, and Randal Burns. Computing scalable multivariate global invariants of large (brain-) graphs. In *Global Conference on Signal and Information Processing (GlobalSIP), 2013 IEEE*, pages 297–300. IEEE, 2013.
  - [61] Nathalie Tzourio-Mazoyer et al. Automated anatomical labeling of activations in spm using a macroscopic anatomical parcellation of the MNI MRI single-subject brain. *Neuroimage*, 15(1): 273–289, 2002.
  - [62] Kenichi Oishi et al. *MRI atlas of human white matter*. Academic Press, 2010.
  - [63] Nikos Makris, Jill M Goldstein, David Kennedy, Steven M Hodge, Verne S Caviness, Stephen V Faraone, Ming T Tsuang, and Larry J Seidman. Decreased volume of left and total anterior insular lobule in schizophrenia. *Schizophrenia research*, 83(2):155–171, 2006.
  - [64] JL Lancaster. The Talairach Daemon, a database server for Talairach atlas labels. *NeuroImage*, 1997. ISSN 1053-8119.
  - [65] R Cameron Craddock, Saad Jbabdi, Chao-Gan Yan, Joshua T Vogelstein, F Xavier Castellanos, Adriana Di Martino, Clare Kelly, Keith Heberlein, Stan Colcombe, and Michael P Milham. Imaging human connectomes at the macroscale. *Nat. Methods*, 10(6):524–539, June 2013. URL <http://dx.doi.org/10.1038/nmeth.2482>.
  - [66] Chandra S Sripada et al. Lag in maturation of the brain's intrinsic functional architecture in attention-deficit/hyperactivity disorder. *Proceedings of the National Academy of Sciences*, 111(39):14259–14264, 2014.
  - [67] Daniel Kessler et al. Modality-spanning deficits in attention-deficit/hyperactivity disorder in functional networks, gray matter, and white matter. *The Journal of Neuroscience*, 34(50):16555–16566, 2014.
  - [68] Rahul S Desikan et al. An automated labeling system for subdividing the human cerebral cortex on MRI scans into gyral based regions of interest. *NeuroImage*, 2006. ISSN 1053-8119. doi:



- 10.1016/j.neuroimage.2006.01.021.
- [69] Ben Langmead and Steven L. Salzberg. Fast gapped-read alignment with Bowtie 2. *Nat. Methods*, 9(4):357–359, Mar 2012. ISSN 1548-7105. doi: 10.1038/nmeth.1923.
- [70] Cencheng Shen and Joshua T Vogelstein. Decision Forests Induce Characteristic Kernels. November 2018. URL <http://arxiv.org/abs/1812.00029>.
- [71] R Core Team. *R: A Language and Environment for Statistical Computing*. R Foundation for Statistical Computing, Vienna, Austria, 2013. URL <http://www.R-project.org/>. ISBN 3-900051-07-0.

## Appendix A. Population and Sample Discr.

Suppose that  $\theta_i \in \Theta$  represents a physical property of interest for a particular item  $i$ . In a biological context, for instance, an item could be a participant in a study, and the property of interest could be the individual's true brain network, or connectome. We cannot directly observe the physical property, but rather, we must first measure  $\theta_i$  and then “wrangle” it. Call the measurement function,  $f \in \mathcal{F}$  for a family of possible measurement functions  $\mathcal{F}$ . That is,  $f : \Theta \rightarrow \mathcal{W}$ . So, measurements of  $\theta_i$  are observed as  $f(\theta_i) = w_i$ . However,  $w_i$  may be a noisy, with measurement artefacts. Alternately,  $w_i$  might not be the property of interest, for example, if the property is a network, perhaps  $w_i$  is a multivariate time-series, from which we can estimate a network. We therefore have another function,  $g \in \mathcal{G} : \mathcal{W} \rightarrow \mathcal{X}$ , which represents the data wrangling procedure to take the measurement and produce an informative derivative (for instance, confound removal). The family of possible data wrangling procedures to produce the informative derivative is  $\mathcal{G}$ . In this fashion, the output of interest is  $x_i = g(f(\theta_i))$ .

The goal of experimental design is to choose an  $f$  and  $g$  that yield high-quality and useful inferences, that is, that yield  $x$ 's that we can use for various inferential purposes. When we have repeated measurements of the same items, we can use those samples to our advantage. Given  $x_i^j$ , which is the  $j^{\text{th}}$  measurement of sample  $i$ , we would expect  $x_i^j$  to be more similar to  $x_i^{j'}$  (another measurement of the same item), than to any measurement of a different item  $x_{i'}^{j''}$ . Formally, let  $\delta : \mathcal{X} \times \mathcal{X} \rightarrow [0, \infty)$  be a distance metric, we define the population Discr:

$$D_{\delta, f, g} = \mathbb{P}\left(\delta(x_i^j, x_i^{j'}) < \delta(x_i^j, x_{i'}^{j''})\right)$$

That is, “population Discr”  $D$  represents the average probability that the *within-item distance*  $\delta(x_i^j, x_i^{j'})$  is less than the *between-item distance*  $\delta(x_i^j, x_{i'}^{j''})$ . Discr depends on the choice of distance  $\delta$ , as well as the measurement protocol  $f$  and the analysis choices  $g$ .

The population Discr represents a property of the distribution of  $\theta_i$ . In real data since we do not observe the true distribution, we instead rely on the sample Discr. Suppose a dataset consists of  $i \in \{1, \dots, n\}$  items, where each item  $i$  has  $J_i$  repeat measurements. The sample Discr is defined:

$$\text{Discr}\left\{x_i^j\right\}_{j \in [J_i], i \in [n]} = \frac{\sum_{i \in [n]} \sum_{j \in [J_i]} \sum_{j' \neq j} \sum_{i' \neq i} \sum_{j'' \in [J_{i'}]} \mathbb{I}\left\{\delta(x_i^j, x_i^{j'}) < \delta(x_i^j, x_{i'}^{j''})\right\}}{\sum_{i \in [n]} \sum_{j \in [J_i]} \sum_{j' \neq j} \sum_{i' \neq i} \sum_{j'' \in [J_{i'}]} 1}.$$

It can be shown [49] that under the multivariate additive noise model; that is,  $x_i^j = \theta_i + \epsilon_i^j$  where  $\epsilon_i^j \stackrel{\text{ind}}{\sim} f_\epsilon$ ,  $\text{var}(\epsilon_i^j) < \infty$ , and  $\mathbb{E}[\epsilon_i^j] = \mathbf{c}$ , that the sample Discr, Discr is both a consistent and unbiased estimator for population Discr.

## Appendix B. Discr Provides an Informative Bound for Inference.

During experimental design, the extent of subsequent inference tasks may be unknown. A natural question may be, what are the implications of the selection of a discriminable experimental design?

Formally, assume the task of interest is binary classification: that is,  $\mathcal{Y} = \{0, 1\}$ , and we seek a classifier  $h : \mathcal{X} \rightarrow \mathcal{Y}$ . The goal of experimental design in this context is to choose the options  $(f^*, g^*)$  that will minimize the classification loss:

$$(f^*, g^*) = \underset{(f, g) \in \mathcal{F} \times \mathcal{G}}{\text{argmin}} \mathbb{P}(h(f(g(\theta))) \neq y)$$

For a fixed  $(f, g)$ , the minimal prediction error is achieved by the Bayes classifier [50]:

$$h_{f, g}^*(\theta_i) \triangleq \underset{y \in \{0, 1\}}{\text{argmax}} \mathbb{P}(y_i = y | f(g(\theta_i))),$$

and let  $L_{f, g}^*$  denote Bayes error, that is, the error achieved by  $h_{f, g}^*$ .

**Theorem B.1.** Assume the multivariate gaussian additive noise setting; that is:

$$(3) \quad \mathbf{x}_i^j = \boldsymbol{\theta}_i + \boldsymbol{\epsilon}_i^j$$

where  $\boldsymbol{\theta}_i \stackrel{iid}{\sim} \mathbb{P}_\theta$ ,  $\text{var}(\boldsymbol{\theta}_i) = \Sigma_\theta$ ,  $\boldsymbol{\epsilon}_i^j \stackrel{iid}{\sim} \mathbb{P}_\epsilon$ , and  $\text{var}(\boldsymbol{\epsilon}_i^j) = \Sigma_\epsilon$  with  $\mathbb{E}[\boldsymbol{\epsilon}_i^j] = \mathbf{c}$ . There exists a decreasing function  $\gamma(\cdot)$  which depends only on  $\boldsymbol{\theta}$  and  $y$  s.t.:

$$L_{f,g}^* \leq \gamma(D_{f,g})$$

That is, the Bayes error can, in fact, be upper bounded by a decreasing function of  $\text{Discr}$ , as shown in the proof below. As a direct consequence of this theorem, we see:

**Corollary B.1.** Assume  $(f_1, g_1)$  and  $(f_2, g_2)$  are two analysis strategies, and suppose that  $D_{f_1, g_1} > D_{f_2, g_2}$ . Then:

$$L_{f_1, g_1}^* \leq L_{f_2, g_2}^*.$$

In other words, the Bayes error achieved by strategy  $(f_1, g_2)$  can, in fact, be upper bounded by the Bayes error achievable by strategy  $(f_2, g_2)$ . Consequently, under the described setting, the pipeline that achieves a higher  $\text{Discr}$  can facilitate improved inference than competing strategies, despite the fact that the task is unknown during data acquisition and analysis. Complementarily, note that if we were to instead consider the predictive accuracy  $1 - L_{f,g}^*$ , we can obtain a similar result to obtain a lower bound on the predictive accuracy via an increasing function of  $\text{Discr}$ . That is, in the context of the corollary, a more discriminable pipeline will tend to have a higher accuracy on an arbitrary predictive task.

*Proof of Theorem (B.1).*

Consider the additive noise setting, that is  $\mathbf{x}_i^j = \boldsymbol{\theta}_i + \boldsymbol{\epsilon}_i^j$ ,

$$\begin{aligned} D &= \mathbb{P}(\delta_{i,t,t'} < \delta_{i,i',t,t'}) \\ &= \mathbb{P}(\|\mathbf{x}_i^j - \mathbf{x}_i^{j'}\| < \|\mathbf{x}_i^j - \mathbf{x}_{i'}^{j''}\|) \\ &= \mathbb{P}(\|\boldsymbol{\epsilon}_i^j - \boldsymbol{\epsilon}_i^{j'}\| < \|\boldsymbol{\theta}_i + \boldsymbol{\epsilon}_i^j - \boldsymbol{\theta}_{i'} - \boldsymbol{\epsilon}_{i'}^{j''}\|) \\ &\leq \mathbb{P}(\|\boldsymbol{\epsilon}_i^j - \boldsymbol{\epsilon}_i^{j'}\| < \|\boldsymbol{\theta}_i - \boldsymbol{\theta}_{i'}\| + \|\boldsymbol{\epsilon}_i^j - \boldsymbol{\epsilon}_{i'}^{j''}\|) \\ &= \mathbb{P}(\|\boldsymbol{\epsilon}_i^j - \boldsymbol{\epsilon}_i^{j'}\| - \|\boldsymbol{\epsilon}_i^j - \boldsymbol{\epsilon}_{i'}^{j''}\| < \|\boldsymbol{\theta}_i - \boldsymbol{\theta}_{i'}\|) \\ &= \frac{1}{2} \mathbb{P}(\|\boldsymbol{\epsilon}_i^j - \boldsymbol{\epsilon}_i^{j'}\| - \|\boldsymbol{\epsilon}_i^j - \boldsymbol{\epsilon}_{i'}^{j''}\| < \|\boldsymbol{\theta}_i - \boldsymbol{\theta}_{i'}\| \mid \|\boldsymbol{\epsilon}_i^j - \boldsymbol{\epsilon}_i^{j'}\| - \|\boldsymbol{\epsilon}_i^j - \boldsymbol{\epsilon}_{i'}^{j''}\| < 0) + \\ &\quad \frac{1}{2} \mathbb{P}(\|\boldsymbol{\epsilon}_i^j - \boldsymbol{\epsilon}_i^{j'}\| - \|\boldsymbol{\epsilon}_i^j - \boldsymbol{\epsilon}_{i'}^{j''}\| < \|\boldsymbol{\theta}_i - \boldsymbol{\theta}_{i'}\| \mid \|\boldsymbol{\epsilon}_i^j - \boldsymbol{\epsilon}_i^{j'}\| - \|\boldsymbol{\epsilon}_i^j - \boldsymbol{\epsilon}_{i'}^{j''}\| > 0) \\ &= \frac{1}{2} + \frac{1}{2} \mathbb{P}(\|\boldsymbol{\epsilon}_i^j - \boldsymbol{\epsilon}_i^{j'}\| - \|\boldsymbol{\epsilon}_i^j - \boldsymbol{\epsilon}_{i'}^{j''}\| < \|\boldsymbol{\theta}_i - \boldsymbol{\theta}_{i'}\| \mid \|\boldsymbol{\epsilon}_i^j - \boldsymbol{\epsilon}_i^{j'}\| - \|\boldsymbol{\epsilon}_i^j - \boldsymbol{\epsilon}_{i'}^{j''}\| > 0) \\ &= \frac{1}{2} + \frac{1}{2} \mathbb{P}(\|\boldsymbol{\epsilon}_i^j - \boldsymbol{\epsilon}_i^{j'}\| - \|\boldsymbol{\epsilon}_i^j - \boldsymbol{\epsilon}_{i'}^{j''}\| < \|\boldsymbol{\theta}_i - \boldsymbol{\theta}_{i'}\|) \\ &= 1 - \frac{1}{2} \mathbb{P}(\|\boldsymbol{\epsilon}_i^j - \boldsymbol{\epsilon}_i^{j'}\| - \|\boldsymbol{\epsilon}_i^j - \boldsymbol{\epsilon}_{i'}^{j''}\| > \|\boldsymbol{\theta}_i - \boldsymbol{\theta}_{i'}\|). \end{aligned}$$

To bound the probability above, we bound the  $\|\boldsymbol{\theta}_i - \boldsymbol{\theta}_{i'}\|$  and  $\|\|\boldsymbol{\epsilon}_i^j - \boldsymbol{\epsilon}_i^{j'}\| - \|\boldsymbol{\epsilon}_i^j - \boldsymbol{\epsilon}_{i'}^{j''}\|\|$  separately. We start with the first term

$$\mathbb{E}(\|\boldsymbol{\theta}_i - \boldsymbol{\theta}_{i'}\|^2) = \mathbb{E}(\boldsymbol{\theta}_i^T \boldsymbol{\theta}_i + \boldsymbol{\theta}_{i'}^T \boldsymbol{\theta}_{i'} - 2\boldsymbol{\theta}_i^T \boldsymbol{\theta}_{i'}) = 2\sigma_2^2.$$

Here,  $\sigma_2^2 = \text{tr}(\Sigma_\theta)$  is the trace of covariance matrix of  $\theta_i$ . We can apply Markov's Inequality for any  $t > 0$ :

$$(4) \quad \mathbb{P}(\|\theta_i - \theta_{i'}\| < t) \geq 1 - \frac{2\sigma_2^2}{t^2}.$$

Let  $\sigma_1^2 = \text{tr}(\Sigma_\epsilon)$  denote the trace of covariance matrix of  $\epsilon_i^j$ , and let  $a$  and  $b$  be two constants satisfy

$$\begin{aligned} \mathbb{E}(\|\epsilon_i^j - \epsilon_i^{j'}\| - \|\epsilon_i^j - \epsilon_i^{j''}\|)^2 &\geq a^2\sigma_1^2, \\ \frac{\mathbb{E}^2(\|\epsilon_i^j - \epsilon_i^{j'}\| - \|\epsilon_i^j - \epsilon_i^{j''}\|)^2}{\mathbb{E}(\|\epsilon_i^j - \epsilon_i^{j'}\| - \|\epsilon_i^j - \epsilon_i^{j''}\|)^4} &\geq b \end{aligned}$$

Furthermore, we let  $t^2 = \sqrt{2}a\sigma_1\sigma_2$ , and let

$$\theta = \frac{t^2}{\mathbb{E}(\|\epsilon_i^j - \epsilon_i^{j'}\| - \|\epsilon_i^j - \epsilon_i^{j''}\|)^2} \leq \frac{\sqrt{2}a\sigma_1\sigma_2}{a^2\sigma_1^2} = \frac{\sqrt{2}\sigma_2}{a\sigma_1}.$$

If  $a^2\sigma_1^2 \geq 2\sigma_2^2$ , then  $\theta \leq 1$ . According to the Paley-Zygmund Inequality [51], that is,

$$\mathbb{P}(Z > \theta\mathbb{E}[Z]) \geq (1 - \theta)^2 \frac{\mathbb{E}[Z]^2}{\mathbb{E}[Z^2]}$$

for all  $0 \leq \theta \leq 1$  and  $Z \geq 0$ , we can plug in the  $\theta$  above to achieve

$$\mathbb{P}(\|\epsilon_i^j - \epsilon_i^{j'}\| - \|\epsilon_i^j - \epsilon_i^{j''}\| > t^2) \geq b \left(1 - \frac{t^2}{a^2\sigma_1^2}\right)^2 = b \left(1 - \frac{\sqrt{2}\sigma_2}{a\sigma_1}\right)^2.$$

Also plug in the  $t^2$  for the inequality 4, we have

$$\mathbb{P}(\|\theta_i - \theta_{i'}\|^2 < t^2) \geq 1 - \frac{2\sigma_2^2}{t^2} = 1 - \frac{\sqrt{2}\sigma_2}{a\sigma_1}.$$

Understand the fact that  $\theta$ 's and  $\epsilon$ 's are independent, we can combine the two inequalities

$$\begin{aligned} D &= \mathbb{P}(\delta_{i,t,t'} < \delta_{i,i',t,t'}) \\ &= \mathbb{P}(\|\mathbf{x}_i^j - \mathbf{x}_i^{j'}\| < \|\mathbf{x}_i^j - \mathbf{x}_{i'}^{j''}\|) \\ &\leq 1 - \frac{1}{2}\mathbb{P}(\|\epsilon_i^j - \epsilon_i^{j'}\| - \|\epsilon_i^j - \epsilon_i^{j''}\| > \|\theta_i - \theta_{i'}\|) \\ &\leq 1 - \frac{1}{2}\mathbb{P}(\|\epsilon_i^j - \epsilon_i^{j'}\| - \|\epsilon_i^j - \epsilon_i^{j''}\| > t^2) \mathbb{P}(\|\theta_i - \theta_{i'}\|^2 < t^2) \\ &\leq 1 - \frac{1}{2}b \left(1 - \frac{\sqrt{2}\sigma_2}{a\sigma_1}\right)^3 \end{aligned}$$

Note that the resulted bound holds true even if  $a^2\sigma_1^2 < 2\sigma_2^2$ , as the right hand side becomes greater than 1. So we can have a bound on  $\frac{\sigma_2}{\sigma_1}$ ,

$$(5) \quad \frac{\sigma_2}{\sigma_1} \geq \frac{a}{\sqrt{2}} \left(1 - \left(\frac{2 - 2D}{b}\right)^{1/3}\right)$$

To obtain a bound on Bayes error, we apply Devijver and Kittler's result [52], which is

$$L \leq \frac{2\pi_0\pi_1}{1 + \pi_0\pi_1\Delta\boldsymbol{\mu}^T\Sigma^{-1}\Delta\boldsymbol{\mu}}.$$

Here,  $\pi_0$  and  $\pi_1$  are prior probabilities for two classes.  $\Delta\boldsymbol{\mu}$  is the difference between means of two classes. Since  $\boldsymbol{\epsilon}$  is assumed to be independent of  $\boldsymbol{x}$  and  $\boldsymbol{y}$ ,

$$\Delta\boldsymbol{\mu} = \mathbb{E}(\boldsymbol{x}|\boldsymbol{y} = 0) - \mathbb{E}(\boldsymbol{x}|\boldsymbol{y} = 1) = \mathbb{E}(\boldsymbol{\theta}|\boldsymbol{y} = 0) - \mathbb{E}(\boldsymbol{\theta}|\boldsymbol{y} = 1).$$

$\boldsymbol{\Sigma}$  is the weighted covariance matrix of  $\boldsymbol{x}$ ,

$$\begin{aligned}\boldsymbol{\Sigma} &= \pi_0 \text{Var}(\boldsymbol{x}|\boldsymbol{y} = 0) + \pi_1 \text{Var}(\boldsymbol{x}|\boldsymbol{y} = 1) \\ &= \pi_0 \text{Var}(\boldsymbol{\theta}|\boldsymbol{y} = 0) + \pi_1 \text{Var}(\boldsymbol{\theta}|\boldsymbol{y} = 1) + \text{Var}(\boldsymbol{\epsilon}).\end{aligned}$$

If we further assume  $\text{Var}(\boldsymbol{\epsilon}) = \sigma_1^2 \boldsymbol{\Sigma}'$  where the trace of  $\boldsymbol{\Sigma}'$  is 1, then inequality 5 implies  $\sigma_1^2 \leq \sigma_{1*}^2$ , where

$$\sigma_{1*} = \frac{\sqrt{2}\sigma_2}{a(1 - (\frac{2-2D}{b})^{1/3})}.$$

Hence,  $\boldsymbol{\Sigma} \leq \boldsymbol{\Sigma}_*$  where

$$\boldsymbol{\Sigma}_* = \pi_0 \text{Var}(\boldsymbol{\theta}|\boldsymbol{y} = 0) + \pi_1 \text{Var}(\boldsymbol{\theta}|\boldsymbol{y} = 1) + \sigma_{1*}^2 \boldsymbol{\Sigma}'.$$

Therefore,  $\boldsymbol{\Sigma}^{-1} \geq \boldsymbol{\Sigma}_*^{-1}$ , and we have

$$L < \frac{2\pi_0\pi_1}{1 + \pi_0\pi_1 \Delta\boldsymbol{\mu}^T \boldsymbol{\Sigma}^{-1} \Delta\boldsymbol{\mu}} < \frac{2\pi_0\pi_1}{1 + \pi_0\pi_1 \Delta\boldsymbol{\mu}^T \boldsymbol{\Sigma}_*^{-1} \Delta\boldsymbol{\mu}}.$$

□

## Appendix C. Hypothesis Testing.

**C.1 Goodness of Fit Test** Recall the goodness of fit test, shown in Equation (1). We approximate the distribution of  $\hat{D}$  under the null through a permutation approach. The item labels of our  $N$  samples are first permuted randomly, and  $\hat{D}_{0,N}$  is computed each time given the observed data  $\boldsymbol{X}$  and the permuted labels. For a level  $\alpha$  significance test, we compare  $\hat{D}$  to the  $(1 - \alpha)$  quantile  $Q_{1-\alpha}$  of the empirical null distribution  $\hat{D}_{0,N}$ , and reject the null hypothesis if  $\hat{D}_N < Q_{1-\alpha}$ . This approach provides a consistent and valid test under general assumptions.

Note that the permutation-based approach requires  $r$  computations of the sample `Discr`. The total computational complexity is then  $\mathcal{O}(N^2 \max(p, rs))$ . This approach is only linear in the number of desired repetitions, and therefore is sensible for most settings in which the sample `Discr` can itself be computed. Moreover, we can greatly speed this computation up through parallelization. With  $T$  cores, the computational complexity is instead  $\mathcal{O}(N^2 \max(p, \frac{r}{T}s))$ , as shown in Algorithm 1. We extend this goodness of fit test to both PICC and I2C2 to provide a robust  $p$ -value associated with both statistics of interest. Note that the permutation approach can be generalized to any statistic quantifying repeatability based on repeated measurements.

---

**Algorithm 1** **Discr Goodness of Fit Test.** Our implementation of the permutation test for the goodness of fit test of the hypothesis given in Equation (1) requires  $\mathcal{O}(N^2 \max(p, \frac{r}{T}s))$  time, where  $r$  is the number of permutations and  $T$  is the number of cores available for the permutation test. The `Shuffle` function is the function which rearranges all of the data within the dataset, without regard to item nor measurement index. The output provides a new measurement index for each item  $i$  and measurement  $j$ .

---

**Input:** (1)  $\{\mathbf{x}_i^j\}_{j \in [J_i], i \in [n]}$   $n$  items of data, each featuring  $J_i$  measurements.  
(2)  $r$  an integer for the number of permutations.

**Output:**  $p \in [0, 1]$  the  $p$ -value associated with the test.

```
1: function  $p = \text{GOODNESSOFFITTEST}(\{\mathbf{x}_i^j\}_{j \in [J_i], i \in [n]}, r)$ 
2:    $d_a = \text{Discr}\{\mathbf{x}_i^j\}_{j \in [J_i], i \in [n]}$  ▷ compute observed sample Discr
   ▷ Note that this for-loop can be parallelized over  $T$  cores, as the loops are independent
3:   for  $i$  in  $1, \dots, r$  do
4:      $\pi = \text{Shuffle}(n, \{J_i\}_{i=1}^n)$  ▷ a random shuffling of the measurements
5:      $d_i = \text{Discr}\{\mathbf{x}_{\pi(i,j)}\}_{j \in [J_i], i \in [n]}$  ▷ Compute Discr with random order of sample ids
6:   end for
7:    $p = \frac{1}{r+1} (\sum_{i=1}^r \mathbb{I}_{\{d_a \geq d_i\}} + 1)$  ▷  $p$ -value is fraction of times observed is more extreme than under null
8:   return  $p$ 
9: end function
```

---

**C.2 Comparison Test** We implement Comparison testing using a permutation approach, similar to the goodness of fit test. First, compute the observed difference in `Discr` between two design choices. The null distribution of the difference in `Discr` is constructed by first taking random convex combinations of the observed data from each of the two methods choices (the "randomly combined datasets"). `Discr` is computed for each of the two randomly combined datasets for each permutation. Finally, for each permutation, the all pairs of observed differences in `Discr` is computed. Finally, the observed statistic is compared with the differences under the null of the randomly combined datasets. The p-value is the fraction of times that the observed statistic is more extreme than the null. Note that we can use this approach for both one and two-tailed hypotheses for an experimental design having higher `Discr`, lower `Discr`, and equal `Discr` relative a second approach; we implement all three in the software implementation of the comparison test. The Algorithm for the comparison test is shown in Algorithm 2, with the alternative hypothesis as specified in Equation (2). The computational complexity is then  $\mathcal{O}\left(\frac{r}{T}N^2 \max(p, \max_i(s_i))\right)$ . Note that for each permutation, the limiting step is the computation of the `Discr` in  $\mathcal{O}(N^2 \max(p, s))$ . This is then offset through parallelization over  $T$  cores in the implementation. We extend this comparison test to all competing approaches to provide a robust  $p$ -value associated with both statistics of interest, for similar reasons to the above. Again, this permutation approach can be generalized to any statistic quantifying repeatability based on repeated measurements.

**Algorithm 2** **DISCR Discriminability Comparison Test.** Our implementation of the permutation test for the hypothesis given in Equation (2) requires  $\mathcal{O}\left(\frac{r}{T}N^2 \max(p, s)\right)$  time, where  $r$  is the number of permutations and  $T$  is the number of cores available for the permutation test. Above, the only alternative considered is that  $H_A : D^{(1)} > D^{(2)}$ ; our code-based implementation provides strategies for  $H_A : D^{(1)} < D^{(2)}$  and  $H_A : D^{(1)} = D^{(2)}$  as well.

**Input:** (1)  $\left\{ \mathbf{x}_i^j \right\}_{j \in [J_i], i \in [n]}$   $n$  items of data, each featuring  $J_i$  measurements, from the first sample.  
 (2)  $\left\{ \mathbf{z}_i^j \right\}_{j \in [J_i], i \in [n]}$   $n$  the observed data, from the second sample.  
 (3)  $r$  an integer for the number of permutations.

**Output:**  $p \in [0, 1]$  the  $p$ -value associated with the test.

```

1: function  $p = \text{COMPARISONTEST}(\left\{ \mathbf{x}_i^j \right\}_{j \in [J_i], i \in [n]}, \left\{ \mathbf{z}_i^j \right\}_{j \in [J_i], i \in [n]}, r)$ 
2:    $\hat{D}^{(1)} = \text{DISCR}\left\{ \mathbf{x}_i^j \right\}_{j \in [J_i], i \in [n]}$  ▷ The DISCR of the first sample.
3:    $\hat{D}^{(2)} = \text{DISCR}\left\{ \mathbf{z}_i^j \right\}_{j \in [J_i], i \in [n]}$  ▷ The DISCR of the second sample.
4:    $d_a = \hat{D}^{(1)} - \hat{D}^{(2)}$  ▷ The observed difference in DISCR between samples 1 and 2.
5:   ▷ The for-loop below can be parallelized over  $T$  cores, as each loop is an independent
6:   for  $i$  in  $1 : r$  do
7:     ▷ Generate a synthetic null dataset for each of the 2 samples, using a convex combination
      of the elements of each sample
8:     for  $k$  in  $1 : 2$  do
9:        $\pi = \text{SHUFFLE}(n, \{J_i\}_{i=1}^n)$  ▷ a random shuffle of the measurements
10:       $\psi = \text{SHUFFLE}(n, \{J_i\}_{i=1}^n)$ 
11:       $\lambda_i^j \stackrel{iid}{\sim} \text{Unif}(0, 1)$  ▷ for  $j = 1, \dots, n$ , where  $\Lambda = (\lambda_j)_{j=1}^n$ 
12:       $\mathbf{u}_i^j = \lambda_i^j \mathbf{x}_{\pi(i,j)} + (1 - \lambda_i^j) \mathbf{z}_{\psi(i,j)}$  ▷ Convex combination of random elements from each
        sample
13:       $d_i^{(k)} = \text{DISCR}\left\{ \mathbf{u}_i^j \right\}_{j \in [J_i], i \in [n]}$  ▷ Compute DISCR of the convexly combined elements
14:    end for
15:  end for
16:  ▷ Compute all pairs differences in DISCR using the convexly-combined samples
17:  for  $i$  in  $1, \dots, r - 1$  do
18:    for  $j$  in  $i + 1, \dots, r$  do
19:       $d_n \leftarrow c\left(d_n, d_{n,i}^{(1)} - d_{n,j}^{(2)}, d_{n,j}^{(2)} - d_{n,i}^{(1)}\right)$  ▷ Null distribution of the difference
20:    end for
21:  end for
22:  ▷  $p$ -value is fraction of times that observed DISCR is more extreme than synthetic datasets
23:   $p = \frac{2}{r(r-1)+1} \left( \sum_{i=1}^{|d_n|} \mathbb{I}_{\{d_a \leq d_{n,i}\}} + 1 \right)$ 
24:  return  $p$ 
25: end function

```



## Appendix D. Simulations.

The following simulations were constructed, where  $\sigma_{min}, \sigma_{max}$  are the variance ranges, and settings were run at 15 intervals in  $[\sigma_{min}, \sigma_{max}]$  for 500 repetitions per setting. For a simulation setting with variance  $\sigma$ , the variance is reported as the normalized variance,  $\bar{\sigma} = \frac{\sigma - \sigma_{min}}{\sigma_{max} - \sigma_{min}}$ . Dimensionality is 2, the number of items is  $K$ , and the total number of measurements across all items is 128. Typically,  $i$  indicates the individual identifier, and  $j$  the measurement index. Notationally, in the below descriptions, we adopt the convention that  $\mathbf{z}_i^j$  obeys the true distribution for a single observation  $j$  of item  $i$ , and  $\mathbf{x}_i^j$  incorporates the controlled error term  $\boldsymbol{\epsilon}_i^j$ , which is the term which is varied the simulation. Further, each item features  $\frac{n}{K}$  measurements.

### D.1 Goodness of Fit Testing and Bayes Error

1. No Signal:  $K = 2$  items, where the true distributions for class 1 and class 2 are the same.
  - $\mathbf{z}_i^j \stackrel{iid}{\sim} \mathcal{N}(\mathbf{0}, \mathbf{I}), i = 1, \dots, 2, t = 1, \dots, 64$ . Note:  $\mathbf{0} \in \mathbb{R}^2$  is  $\mathbf{0}$ , and likewise for  $\mathbf{I}$
  - $\boldsymbol{\epsilon}_i^j \stackrel{iid}{\sim} \mathcal{N}(\mathbf{0}, \sigma^2 \mathbf{I}), \sigma \in [0, 20]$
  - $\mathbf{x}_i^j = \mathbf{z}_i^j + \boldsymbol{\epsilon}_i^j \stackrel{iid}{\sim} \mathcal{N}(\mathbf{0}, (1 + \sigma^2) \mathbf{I})$
2. Cross:  $K = 2$  items, where the true distributions for class 1 and class 2 are orthogonal.
  - $\Sigma_1 = \begin{bmatrix} 2 & 0 \\ 0 & 0.1 \end{bmatrix}, \Sigma_2 = \begin{bmatrix} 0.1 & 0 \\ 0 & 2 \end{bmatrix}$
  - $\mathbf{z}_i^j \stackrel{iid}{\sim} \mathcal{N}(\mathbf{0}, \Sigma_i), i = 1, 2$
  - $\boldsymbol{\epsilon}_i^j \stackrel{iid}{\sim} \mathcal{N}(\mathbf{0}, \sigma^2 \mathbf{I}), \sigma \in [0, 20]$
  - $\mathbf{x}_i^j = \mathbf{z}_i^j + \boldsymbol{\epsilon}_i^j$
3. Gaussian:  $K = 16$  items, where the true distributions are each gaussian.
  - $\boldsymbol{\mu}_i \stackrel{iid}{\sim} \pi_1 \mathcal{N}(\mathbf{0}, 4\mathbf{I}), i = 1, \dots, 16$
  - $\Sigma = \begin{bmatrix} 1 & 0.1 \\ 0.1 & 1 \end{bmatrix}$
  - $\mathbf{z}_i^j \stackrel{iid}{\sim} \mathcal{N}(\boldsymbol{\mu}_i, \Sigma)$
  - $\boldsymbol{\epsilon}_i^j \stackrel{iid}{\sim} \mathcal{N}(\mathbf{0}, \sigma^2 \mathbf{I}), \sigma \in [0, 20]$
  - $\mathbf{x}_i^j = \mathbf{z}_i^j + \boldsymbol{\epsilon}_i^j$
4. Ball/Circle:  $K = 2$  items, where 1 item is uniformly distributed on the unit ball with gaussian error, and the second item is uniformly distributed on the unit sphere with gaussian error.
  - $\mathbf{z}_1^t \stackrel{iid}{\sim} \mathbb{B}(r = 1) + \mathcal{N}(\mathbf{0}, 0.1\mathbf{I})$  samples uniformly on unit ball of radius 2 with Gaussian error
  - $\mathbf{z}_2^t \stackrel{iid}{\sim} \mathbb{S}(r = 1.5) + \mathcal{N}(\mathbf{0}, 0.1\mathbf{I})$  samples uniformly on unit sphere of radius 2 with Gaussian error
  - $\boldsymbol{\epsilon}_i^j \stackrel{iid}{\sim} \mathcal{N}(\mathbf{0}, \sigma^2 \mathbf{I}), \sigma \in [0, 10]$
  - $\mathbf{x}_i^j = \mathbf{z}_i^j + \boldsymbol{\epsilon}_i^j$
5. XOR:  $K = 2$  items, where:
  - $\mathbf{z}_1^t = \begin{cases} \mathbf{0} & t \in 1, \dots, 32 \\ \mathbf{1} & t \in 33, \dots, 64 \end{cases}$
  - $\mathbf{z}_2^t = \begin{cases} [0, 1]' & t \in 1, \dots, 32 \\ [1, 0]' & t \in 33, \dots, 64 \end{cases}$
  - $\boldsymbol{\epsilon}_i^j \stackrel{iid}{\sim} \mathcal{N}(\mathbf{0}, \sigma^2 \mathbf{I}), \sigma \in [0, 0.8]$
  - $\mathbf{x}_i^j = \mathbf{z}_i^j + \boldsymbol{\epsilon}_i^j$

Bayes error was estimated by simulating  $n = 10,000$  points according to the above simulation settings, and approximating the Bayes error through numerical integration. The classification labels for  $K = 2$  simulations were consistent with the individual labels, and for the  $K = 16$ , the first class consists of the 8 distributions whose means were leftmost, and the rest of the distributions were the other class.

**D.2 Comparison Testing** Items are sampled with the same true distributions  $\mathbf{z}_i^j$  as before, with the following augmentation:

$$\mathbf{x}_{i,k}^j = \begin{cases} \mathbf{z}_i^j & k = 1 \\ \mathbf{z}_i^j + \boldsymbol{\epsilon}_i^j & k = 2 \end{cases}$$

That is, the observed data  $\mathbf{x}_{i,k}^j$  for item  $i$ , observation  $j$ , and sample  $k \in [2]$  is such that the first sample is distributed according to the true item distribution, and the second sample is distributed according to the true item distribution with an added noise term, where  $\boldsymbol{\epsilon}_i^j \stackrel{iid}{\sim} \mathcal{N}(\mathbf{0}, \sigma^2 \mathbf{I})$ :

1. No Signal:  $K = 2$ 
  - $\sigma \in [0, 10]$
2. Cross:  $K = 2$ 
  - $\sigma \in [0, 1]$
3. Gaussian:  $K = 16$ 
  - $\sigma \in [0, 1]$
4. Ball/Circle:  $K = 2$ 
  - $\sigma \in [0, 1]$
5. XOR:  $K = 2$ 
  - $\mathbf{x}_{i,k}^j = \begin{cases} \mathbf{z}_i^j + \boldsymbol{\tau}_i^j & k = 1 \\ \mathbf{z}_i^j + \boldsymbol{\tau}_i^j + \boldsymbol{\epsilon}_i^j & k = 2 \end{cases}$  where  $\boldsymbol{\tau}_i^j \stackrel{iid}{\sim} \mathcal{N}(\mathbf{0}, 0.1 \mathbf{I})$
  - $\sigma \in [0, 0.2]$

By construction, one would anticipate  $\text{Discr}$  of the first sample to exceed that of the second sample, as the second sample has additional error. Therefore, the natural hypothesis is:

$$H_0 : D^{(1)} = D^{(2)}, \quad H_A : D^{(1)} > D^{(2)}$$

## Appendix E. Connectomics Application.

### E.1 Data Acquisition and Analysis

*fMRI Analysis Pipelines* The fMRI connectomes were acquired as follows. Motion correction is performed via `mcflyrt` to estimate the 6 motion parameters ( $x, y, z$  translation and rotations). Registration is performed by first performing a cross-modality registration from the functional to the anatomical MRI using `flirt-bbr`, followed by registration to the anatomical template using either (1) FSL-`fnirt` or (2) ANTs-SyN, two techniques for non-linear registration. Frequency filtering was performed by either (1) not frequency filtering, or (2) bandpass filtering signal outside of the  $[.01, .1]$  Hz range. Volumes were either (1) not scrubbed, or (2) scrubbed if motion exceeded 0.5 mm, in which case the preceding volume and succeeding two volumes were removed. Global signal regression was either (1) not performed, or (2) performed by removing the global mean signal across all voxels in the functional timeseries. Moreover, across all analysis pipelines, the top 5 principal components (`compcor`), Friston 24 parameters, and a quadratic polynomial were fit and regressed from the functional timeseries. Finally, the voxelwise timeseries were spatially downsampled using (1) the CC200 parcellation, (2) the AAL parcellation, (3) the Harvard-Oxford parcellation, or (4) the Desikan-Killany parcellation. Graphs were estimated by (1) computing the rank of the non-zero raw absolute correlations (zero-weight edges given a value of 0), (2) log-transforming the raw absolute correlations (the minimum value of the graph is down-scaled by a factor of 100 and then added to each edge to eliminate taking log of zero-weight edges), or (3) computing the raw absolute correlation between pairs of regions of interest in each parcellation. No mean centering was performed for functional connectivity estimates. Specific data analysis instructions for deployment in AWS can be found in the <https://neurodata.io/m2g>. All data analysis was performed in the AWS cloud using CPAC version 3.9.2 [37]. All parcellations are available in `neuroparc` human brain atlases [53].

**dMRI Analysis Pipelines** The dMRI connectomes were acquired as follows. The dMRI scans were corrected for eddy currents using FSL's `eddy-correct` [54]. FSL's "standard" linear registration pipeline was used to register the sMRI and dMRI images to the MNI152 atlas [54–57]. A tensor model is fit using DiPy [58] to obtain an estimated tensor at each voxel. A deterministic tractography algorithm is applied using DiPy's `EuDX` [58, 59] to obtain streamlines, which indicate the voxels connected by an axonal fiber tract. Graphs are formed by contracting voxels into graph vertices depending on spatial [60], anatomical [61–64], or functional [65–68] similarity. Given a parcellation with vertices  $V$  and a corresponding mapping  $P(v_i)$  indicating the voxels within a region  $i$ , we contract our fiber streamlines as follows.  $w(v_i, v_j) = \sum_{u \in P(v_i)} \sum_{w \in P(v_j)} \mathbb{I}\{F_{u,w}\}$  where  $F_{u,w}$  is true if a fiber tract exists between voxels  $u$  and  $w$ , and false if there is no fiber tract between voxels  $u$  and  $w$ . The specific parcellations leveraged are detailed in Kiar et al. [36], consisting of parcellations defined in the MNI152 space [61–68]. The graphs are then re-weighted using the aforementioned weighting schemes described in fMRI Analysis Pipelines Appendix E.1; namely, the raw, ranked, and log edge-weights. All parcellations are available in `neuroparc` human brain atlases [53].

**PCR RealSeqS Cancer Genomics Pipeline** The RealSeqS samples were acquired as follows. PCR was performed in 25  $\mu\text{L}$  reactions containing 7.25  $\mu\text{L}$  of water, 0.125  $\mu\text{L}$  of each primer, 12.5  $\mu\text{L}$  of NEBNext Ultra II Q5 Master Mix (New England Biolabs cat # M0544S), and 5  $\mu\text{L}$  of DNA. The cycling conditions were: one cycle of 98°C for 120 s, then 15 cycles of 98°C for 10 s, 57°C for 120 s, and 72°C for 120 s. Each plasma DNA sample was assessed in eight independent reactions, and the amount of DNA per reaction varied from 0.1  $\mu\text{g}$  to 0.25  $\mu\text{g}$ . A second round of PCR was then performed to add dual indexes (barcodes) to each PCR product prior to sequencing. The second round of PCR was performed in 25  $\mu\text{L}$  reactions containing 7.25  $\mu\text{L}$  of water, 0.125  $\mu\text{L}$  of each primer, 12.5  $\mu\text{L}$  of NEBNext Ultra II Q5 Master Mix (New England Biolabs cat # M0544S), and 5  $\mu\text{L}$  of DNA containing 5% of the PCR product from the first round. The cycling conditions were: one cycle of 98°C for 120 s, then 15 cycles of 98°C for 10 s, 65°C for 15 s, and 72°C for 120 s. Amplification products from the second round were purified with AMPure XP beads (Beckman cat # a63880), as per the manufacturer's instructions, prior to sequencing. As noted above, each sample was amplified in eight independent PCRs in the first round. Each of the eight independent PCRs was then re-amplified using index primers in the second PCR round. `Bowtie2` was then used to align reads to the human reference genome assembly GRC37 [69] for each well. After alignment to  $\sim 750,000$  amplicons, the wells were downsampled into non-overlapping windows of  $5 \times 10^4$  bases,  $5 \times 10^5$  bases,  $5 \times 10^6$  bases, or to the individual chromosome level (the resolution of the data).

**E.2 Effect Size Investigation** In this investigation, we are interested in learning how maximization based on the observed notion of reliability correlates with real performance on a downstream inference task. Recalling Corollary (B.1), we explore the implications of this corollary in a large neuroimaging dataset provided by the Consortium for Reliability and Reproducibility [19], and demonstrate that selection of the experimental design via `Discr`, in fact, facilitates improved downstream inference on both a regression and classification task. We further extend this to two separate genomics datasets investigating classification tasks, and again demonstrate that selection of experimental design via `Discr` improves downstream inference. This provides strong motivation for leveraging the `Discr` for experimental design.

Ideally, for a particular summary reference statistic, a high value will generally correlate with a positive effect size. For datasets  $i = 1, \dots, M$  where  $M$  is the total number of datasets, an analysis strategy  $j = 1, \dots, 192$  for 192 total analysis strategies, and  $k = 1, \dots, 3$  are our summary reference statistics of interest (`Discr`, `PICC`, `AFPI`, `I2C2`, `DISCO`), we fit the standard linear regression model  $Y = \beta X + \epsilon$ , where we model the effect size  $Y$  estimated by `DCorr` [70] via a linear relationship with  $X$ , the observed reference statistic for approach  $k$ , with coefficient  $\beta$ . Note that the interpretation of  $\beta$  is the expected change in the effect size  $Y$  due to a single unit change in the observed reference statistic  $X$ . Both  $Y$  and  $X$  are uniformly normalized across all strategies within a single dataset to facilitate

| Dataset | Manuf.  | Model   | TE (ms) | TR (ms)  | STC    | #Timepts | #Sub | #Ses | #Scans | Discr |
|---------|---------|---------|---------|----------|--------|----------|------|------|--------|-------|
| KKI2009 | NA      | NA      | NA      | NA       | NA     | NA       | 21   | 1    | 42     | 0.93  |
| NKI24   | Siemens | TrioTim | 30      | 645      | inter. | 900      | 24   | 2    | 47     | 0.98  |
| BNU1    | Siemens | TrioTim | 30      | 2000     | inter. | 200      | 50   | 2    | 100    | 0.97  |
| BNU2    | Siemens | TrioTim | 30      | variable | inter. | variable | 50   | 2    | 100    | 0.92  |
| DC1     | Philips | NaN     | 35      | 2500     | inter. | 120      | 114  | 4    | 244    | 0.95  |
| HNU1    | GE      | MR750   | 30      | 2000     | inter. | 300      | 30   | 10   | 300    | 0.98  |
| IACAS   | GE      | Signa   | 30      | 2000     | inter. | 240      | 28   | 3    | 59     | 0.83  |
| IBATRT  | Siemens | TrioTim | 30      | 1750     | seq.   | 220      | 36   | 2    | 50     | 0.95  |
| IPCAS   | NA      | NA      | NA      | NA       | NA     | NA       | 78   | 2    | 156    | 0.99  |
| IPCAS1  | Siemens | TrioTim | 30      | 2000     | inter. | 205      | 30   | 2    | 60     | 1.00  |
| IPCAS2  | Siemens | TrioTim | 30      | 2500     | inter. | 212      | 35   | 2    | 70     | 0.98  |
| IPCAS5  | Siemens | TrioTim | 30      | 2000     | inter. | 170      | 22   | 2    | 44     | 0.96  |
| IPCAS6  | Siemens | TrioTim | 30      | 2500     | inter. | 242      | 2    | 15   | 30     | 1.00  |
| IPCAS8  | Siemens | TrioTim | 30      | 2000     | inter. | 240      | 13   | 2    | 26     | 0.96  |
| JHNU    | Siemens | TrioTim | 30      | 2000     | inter. | 250      | 30   | 2    | 60     | 0.96  |
| LMU3    | Siemens | TrioTim | 30      | 3000     | inter. | 120      | 25   | 2    | 50     | 0.93  |
| MRN1    | NA      | NA      | NA      | NA       | NA     | NA       | 53   | 2    | 88     | 0.94  |
| NYU1    | Siemens | Allegra | 25      | 2000     | NaN    | 197      | 25   | 3    | 75     | 0.98  |
| NYU2    | Siemens | Allegra | 15      | 2000     | inter. | 180      | 187  | 3    | 252    | 0.96  |
| SWU1    | Siemens | TrioTim | 30      | 2000     | inter. | 240      | 20   | 3    | 59     | 0.97  |
| SWU2    | Siemens | TrioTim | 30      | 2000     | inter. | 300      | 27   | 2    | 54     | 0.96  |
| SWU3    | Siemens | TrioTim | 30      | 2000     | inter. | 242      | 24   | 2    | 48     | 0.98  |
| SWU4    | Siemens | TrioTim | 30      | 2000     | inter. | 242      | 235  | 2    | 467    | 0.97  |
| UM      | Siemens | TrioTim | 30      | 2000     | seq.   | 150      | 80   | 2    | 160    | 0.99  |
| UPSM1   | Siemens | TrioTim | 29      | 1500     | seq.   | 200      | 100  | 3    | 230    | 0.89  |
| Utah1   | Siemens | TrioTim | 28      | 2000     | inter. | 240      | 26   | 2    | 52     | 0.92  |
| UWM     | GE      | MR750   | 25      | 2600     | inter. | 231      | 25   | 2    | 50     | 0.96  |
| XHCUMS  | Siemens | TrioTim | 30      | 3000     | inter. | 124      | 24   | 5    | 120    | 0.91  |

Figure 5: **fMRI Dataset Descriptions.** In the above table, STC corresponds to slice timing correction. Rows with NA entries do not have available metadata associated with the scanning protocol. The sample stabilities correspond to the `Discr` of the best performing pipeline overall, FNNNCP.

intuitive comparison across methods. For each reference statistic  $k$ , we pose the following hypothesis:

$$H_0 : \beta = 0; \quad H_A : \beta > 0$$

Acceptance of the alternative hypothesis would have the interpretation that an increase in the observed reference statistic  $X$  would tend to correspond to an increase in the observed effect size  $Y$ , and the relevant test is the one-way  $Z$ -test. To robustify against model assumptions, we use robust standard errors [41]. Acceptance of the alternative hypothesis against the null provides evidence that an increase in the sample statistic corresponds to an increase in the observed effect size, where the responses (age, sex, cancer status) were not considered at the time the data were analyzed nor when the reference statistics computed. This provides evidence that the statistic is informative for experimental design within the context of this investigation. Model fitting for this investigation is conducted using the `lm` package in the R programming language [71].

### E.3 Human Brain Imaging Dataset Descriptions

| Dataset | Manuf.  | Model   | TE (ms) | TR (ms) | #Dir | bval $\frac{s}{mm^2}$ | #Sub | #Ses | #Scans | Discr |
|---------|---------|---------|---------|---------|------|-----------------------|------|------|--------|-------|
| BNU1    | Siemens | TrioTim | 89      | 8000    | 30   | 1000                  | 57   | 2    | 113    | 1.00  |
| HNU1    | GE      | MR750   | Min     | 8600    | 33   | 1000                  | 30   | 10   | 300    | 0.99  |
| KKI2009 | NA      | NA      | NA      | NA      | NA   | NA                    | 21   | 2    | 42     | 1.00  |
| NKI24   | Siemens | TrioTim | 95      | 2400    | 137  | 1500                  | 20   | 2    | 40     | 1.00  |
| SWU4    | Siemens | TrioTim | NaN     | NaN     | 93   | 1000                  | 227  | 2    | 454    | 0.88  |

Figure 6: **dMRI Dataset Descriptions.** In the above table, `Dir` corresponds to the number of diffusion directions. Rows with NA entries do not have available metadata associated with the scanning protocol. The sample stabilities correspond to the `Discr` of the pipeline with the CPAC200 parcellation and the log-transformed edges.

*Useful Data Links* All relevant analysis scripts and data for figure reproduction in this manuscript made publicly available, and can be found at <https://neurodata.io/mgc>.
